# Supplementary material
Source: PubMed Central journal article supplement (PMC7211446)

**Calcarine (S1)**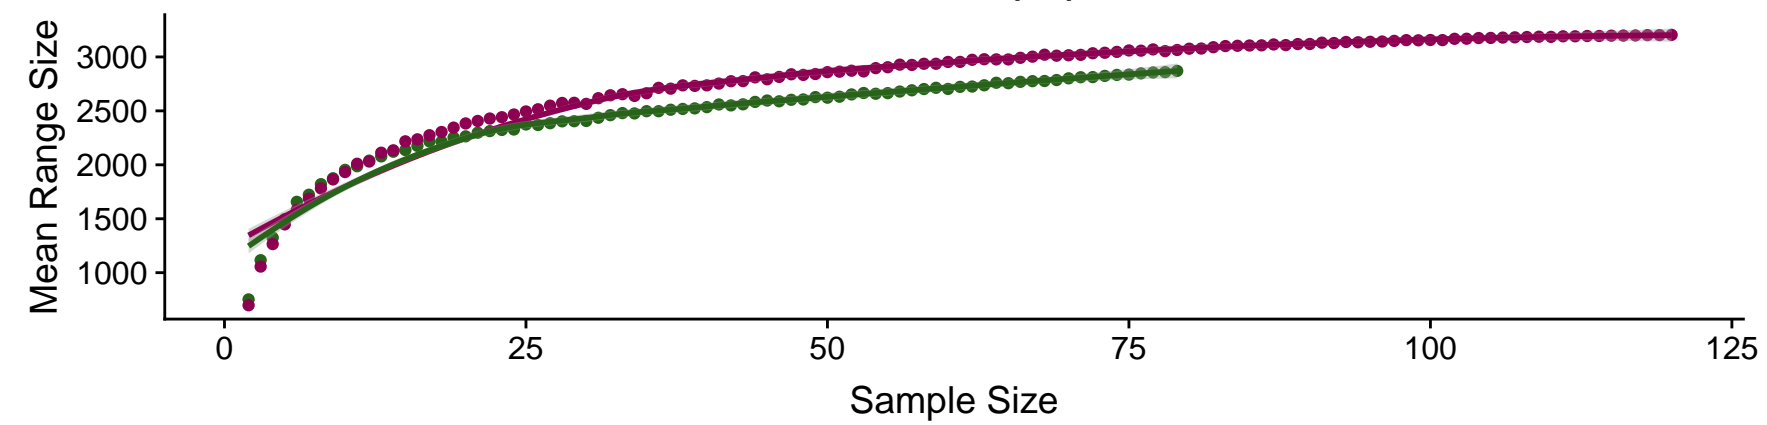**Cingulate (S2)**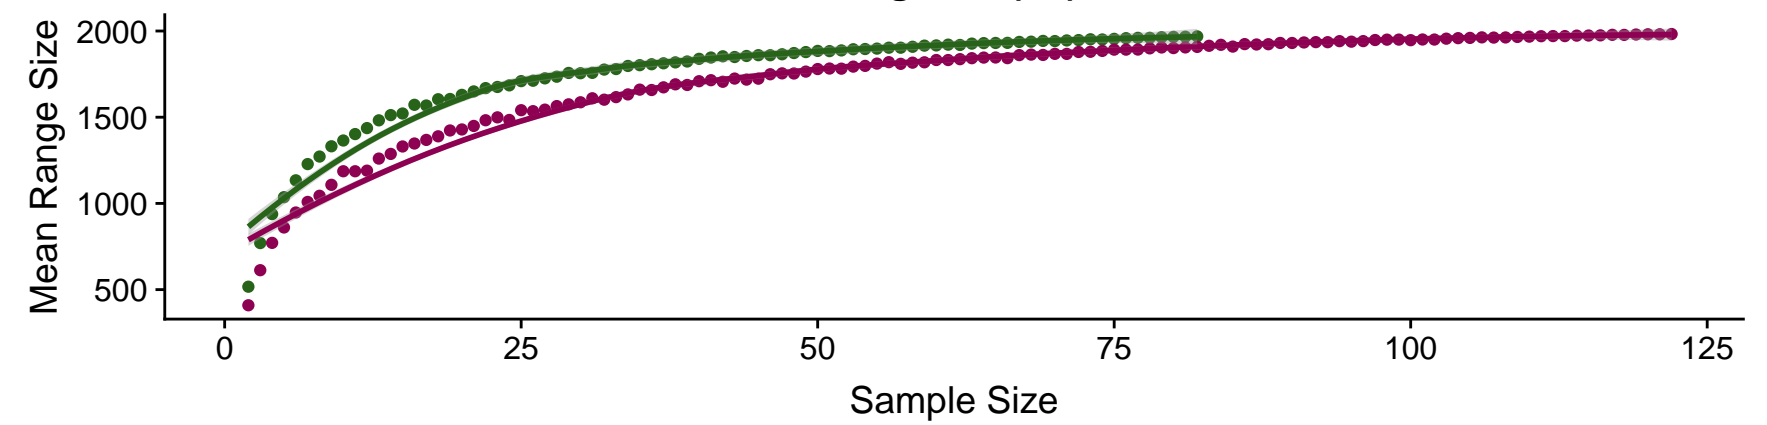**Cuneate (S3)**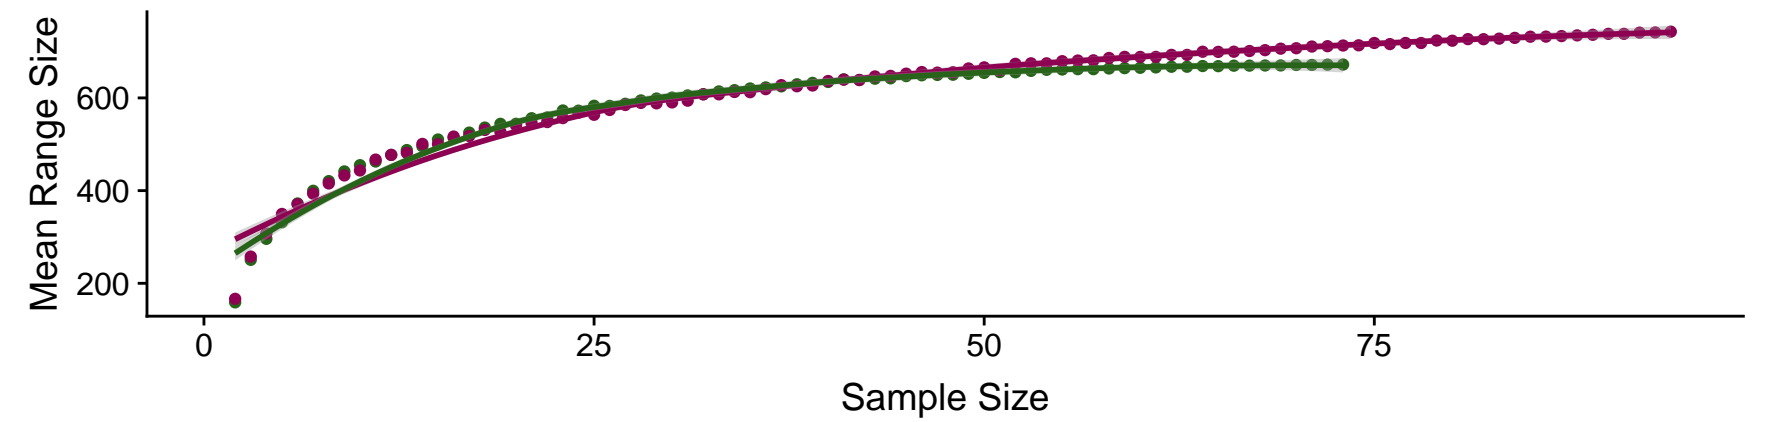**Fronto-Orbital (S4)**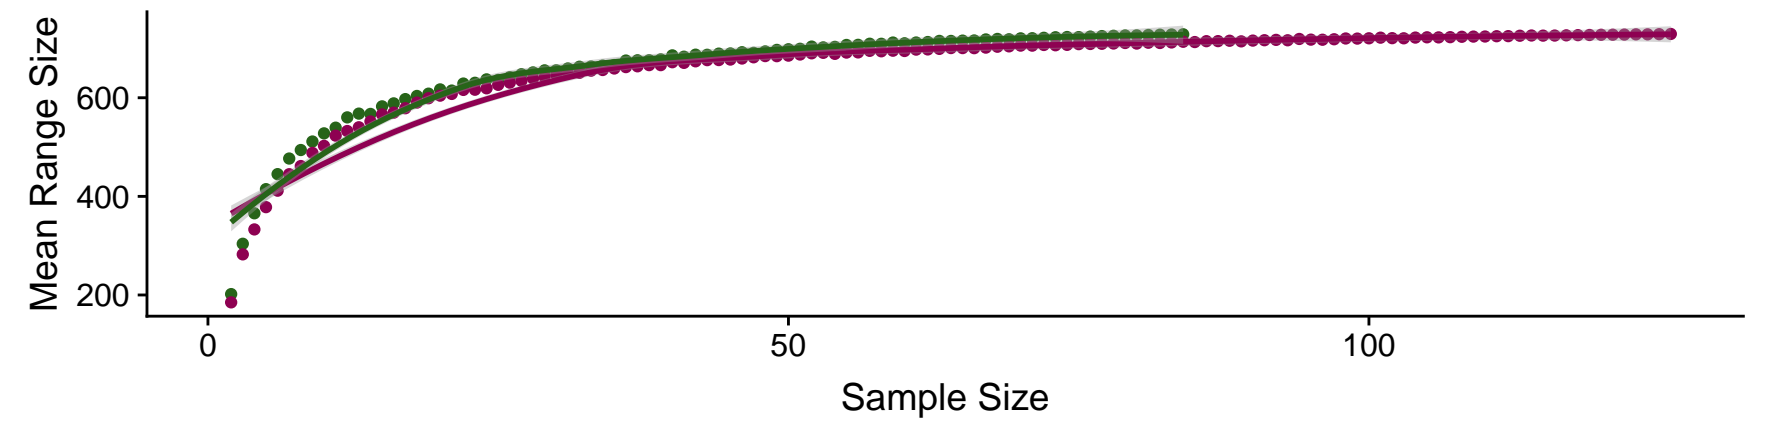**Inferior Frontal (S5)**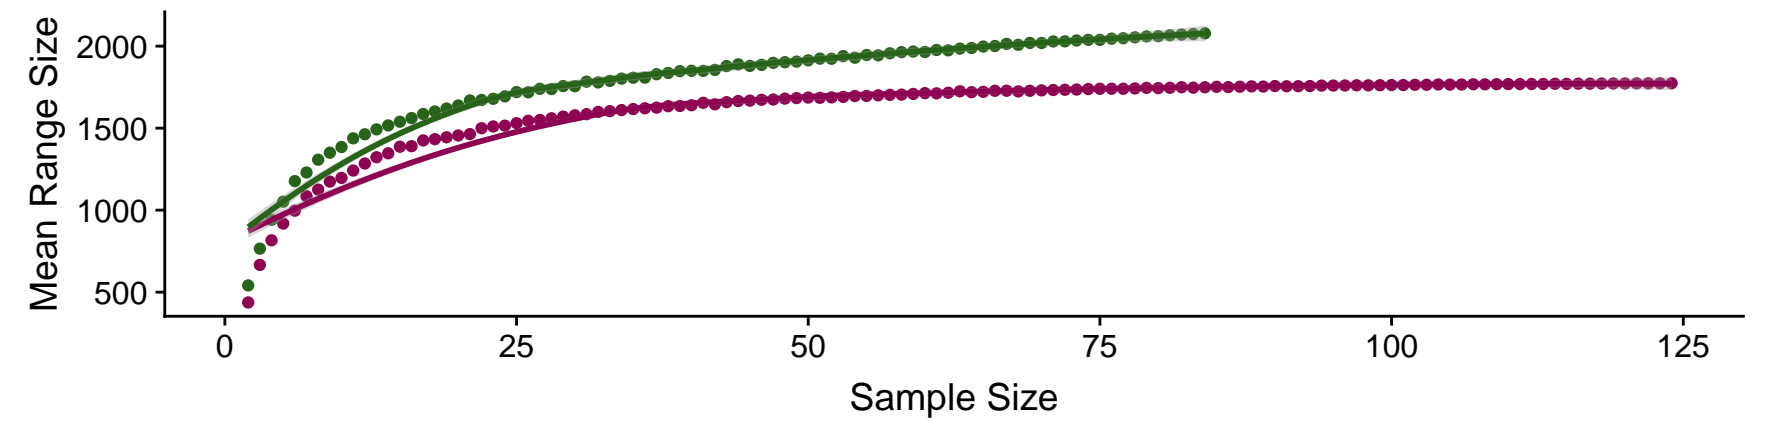**Inferior Postcentral (S6)**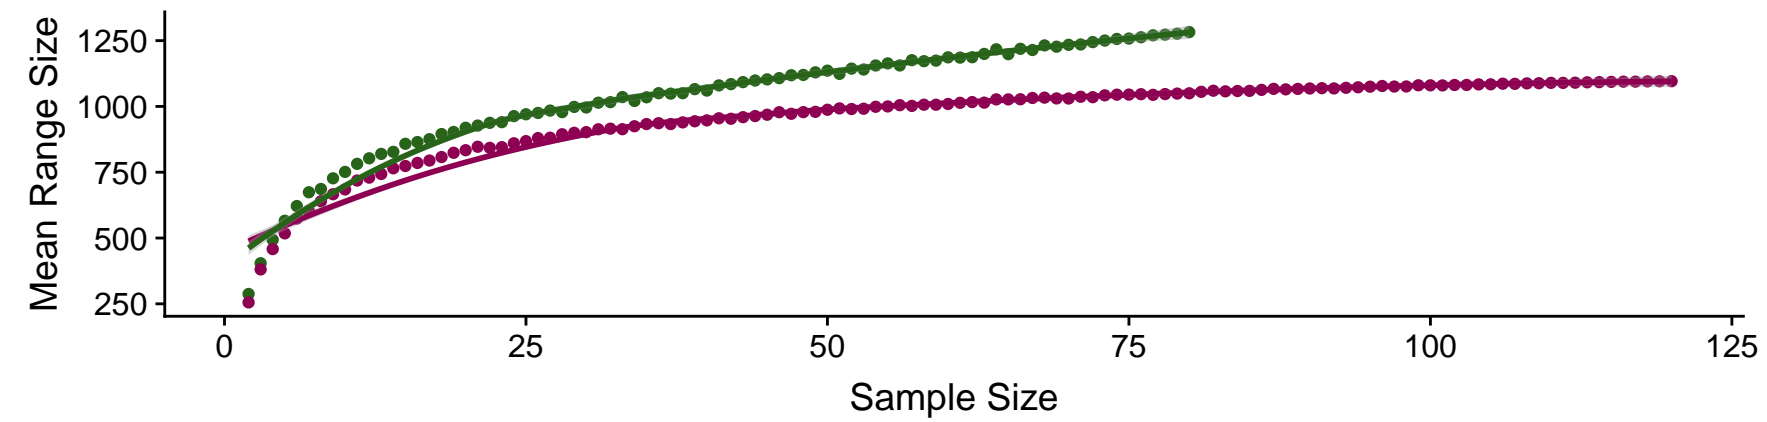**Inferior Precentral (S7)**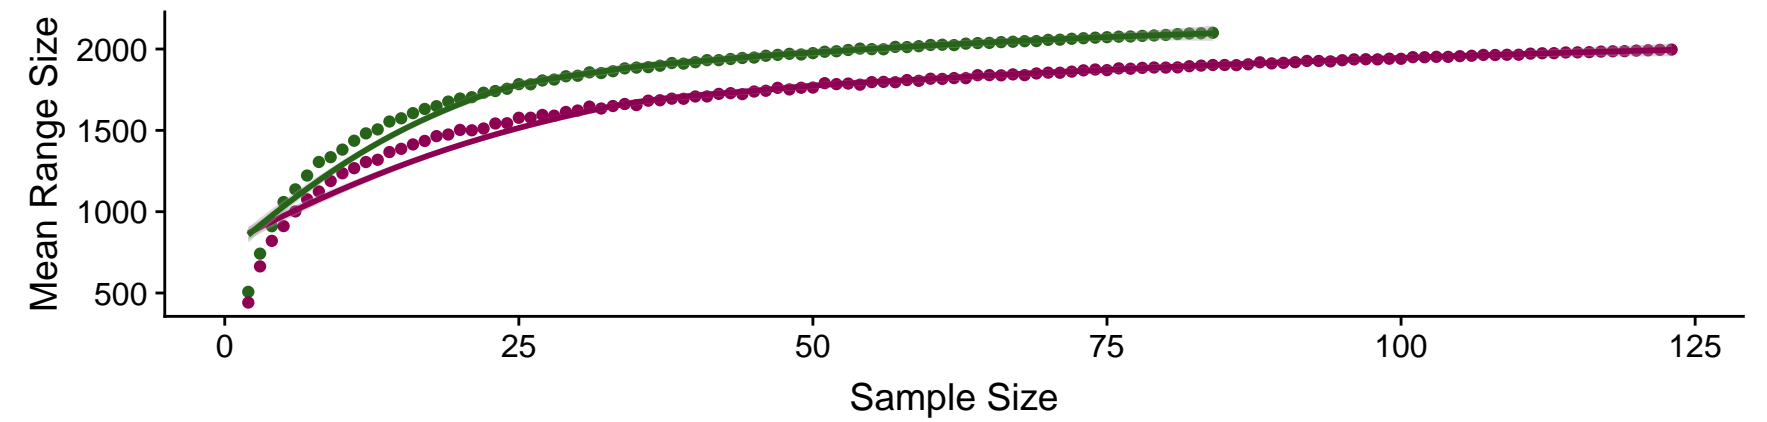**Inferior Temporal (S8)**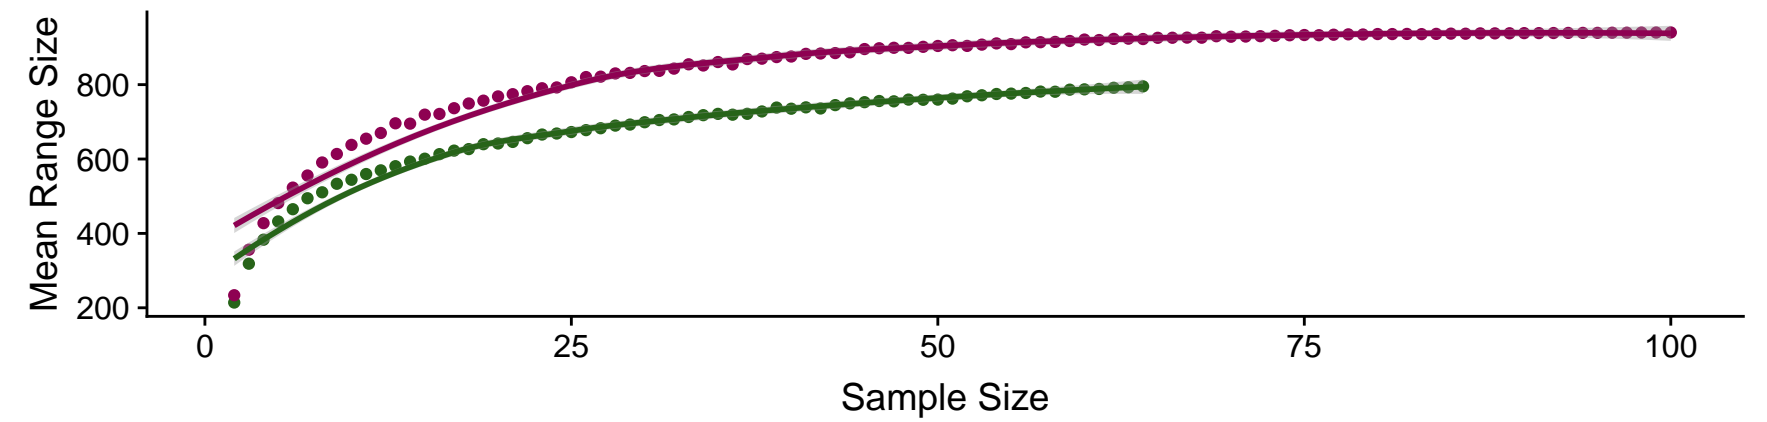

Supplement: rspb20192858supp3.pdf [file rspb20192858supp3.pdf]
