# Supplementary material
Source: PubMed Central journal article supplement (PMC7211446)
Supplement: rspb20192858supp4.pdf [file rspb20192858supp4.pdf]

**Intraparietal (S9)**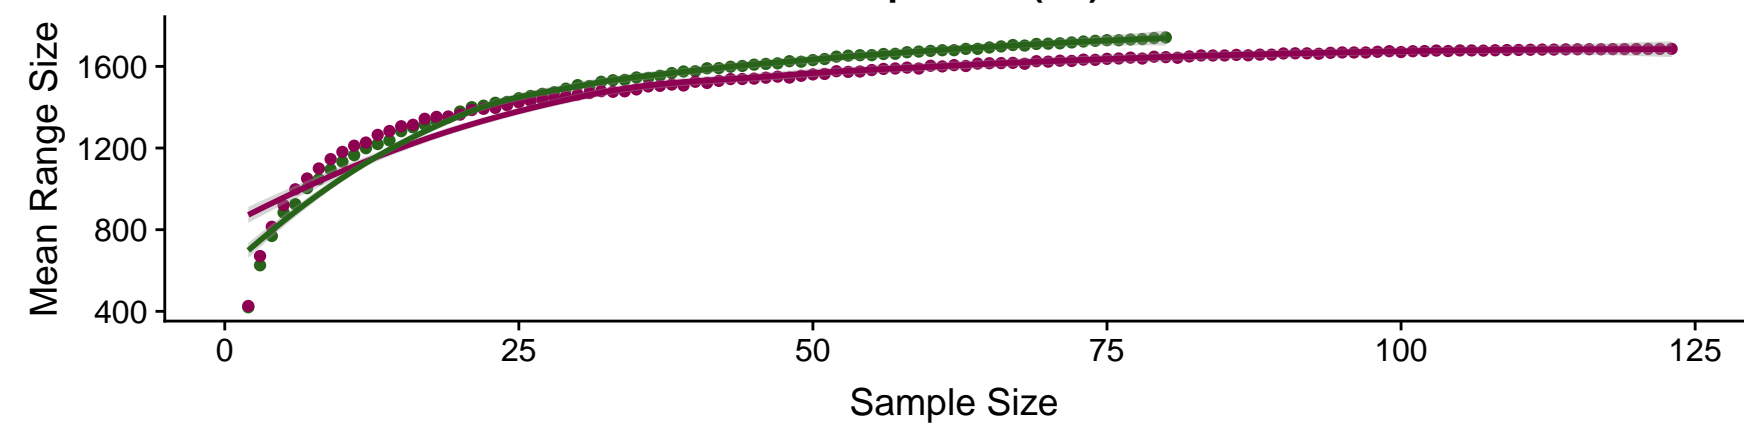

sex  
F  
M

**Lunate (S10)**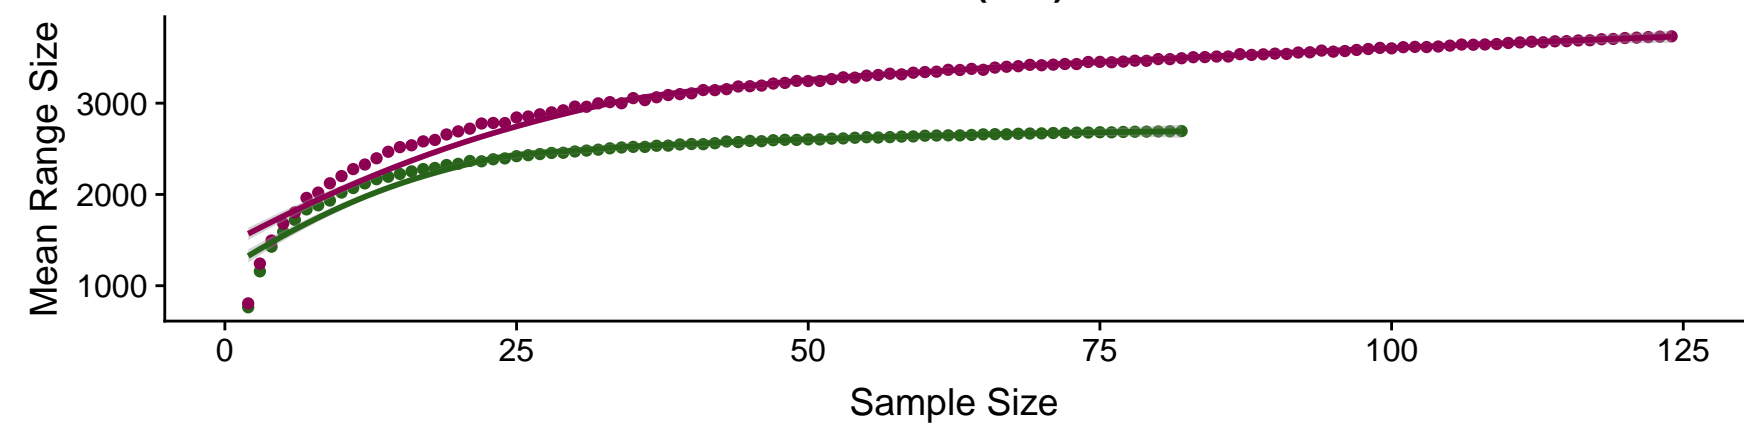

sex  
F  
M

**Medial Parieto-Occipital (S11)**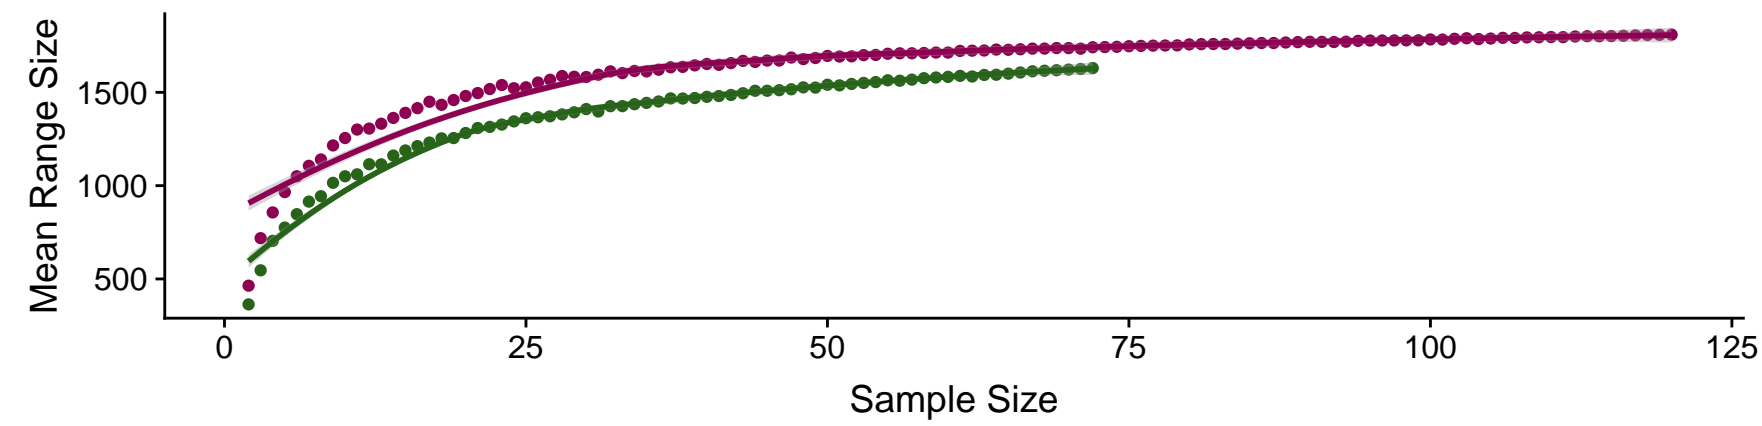

sex  
F  
M

**Middle Frontal (S12)**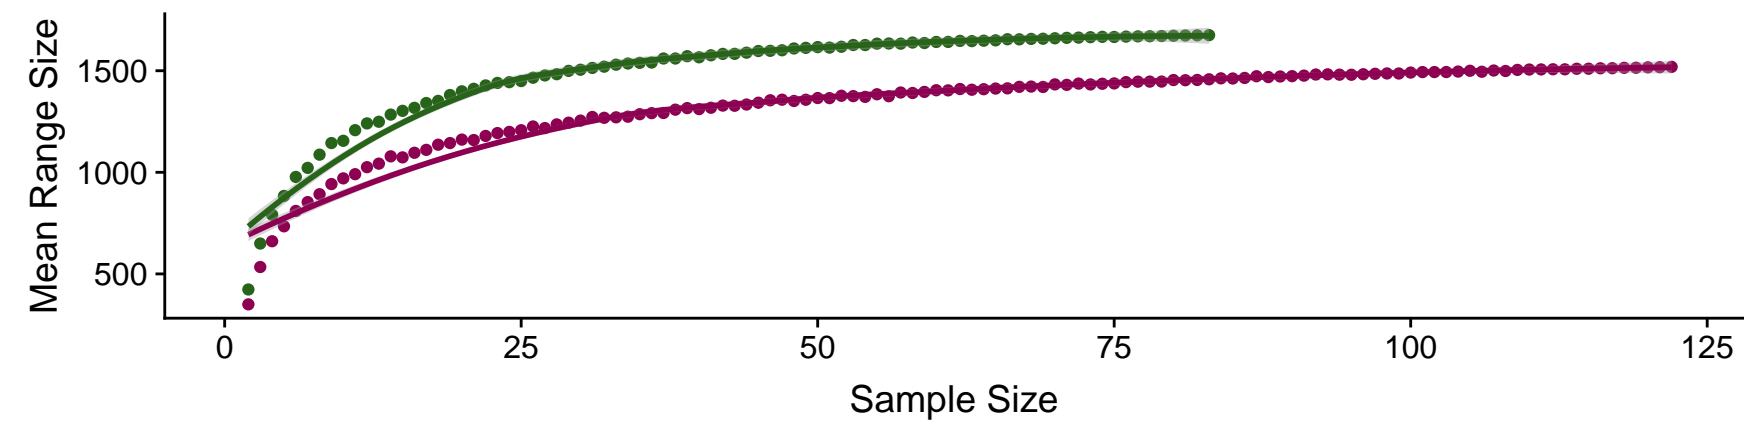

sex  
F  
M

**Middle Temporal (S13)**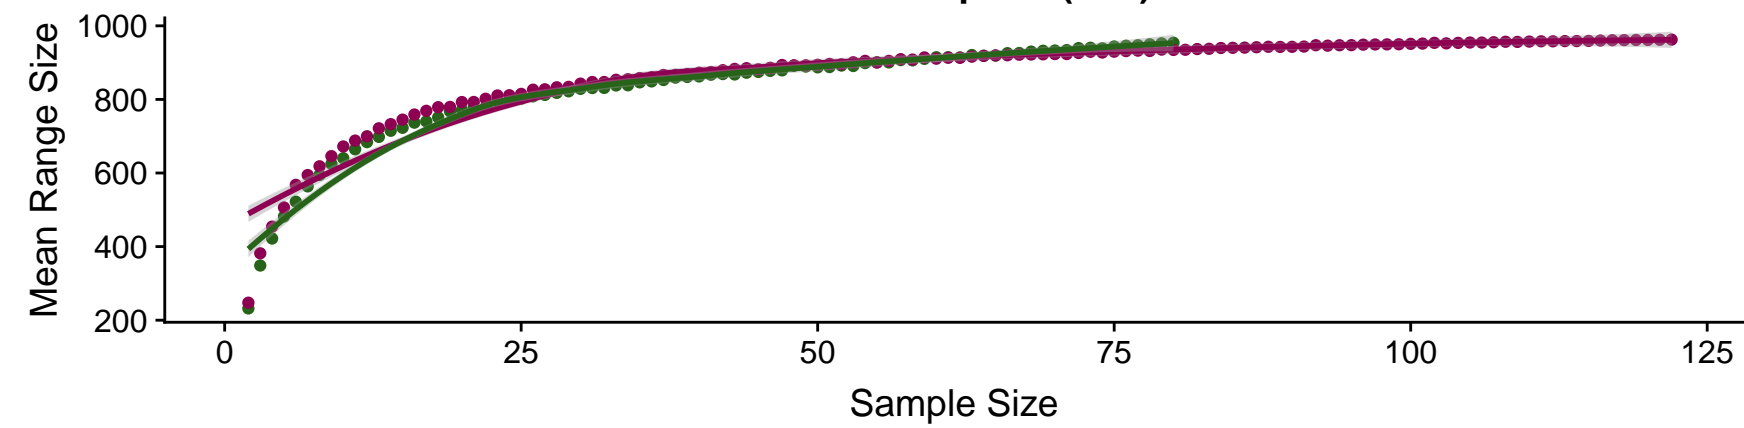

sex  
F  
M

**Mid-Superior Frontal (S14)**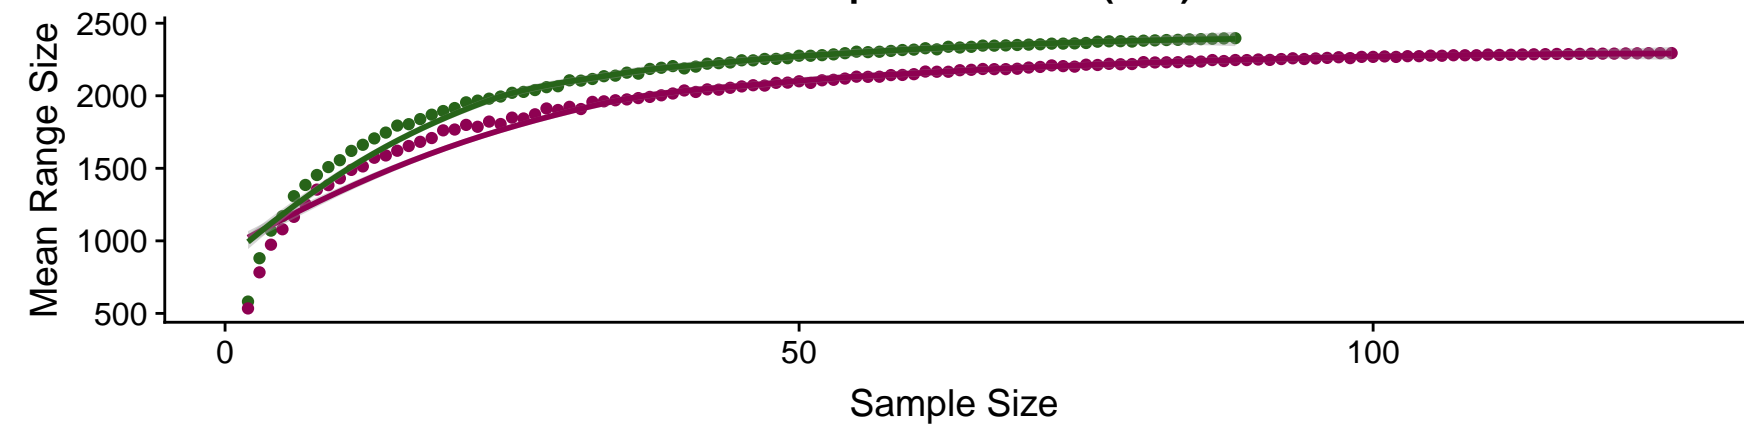

sex  
F  
M

**Occipital Lateral (S15)**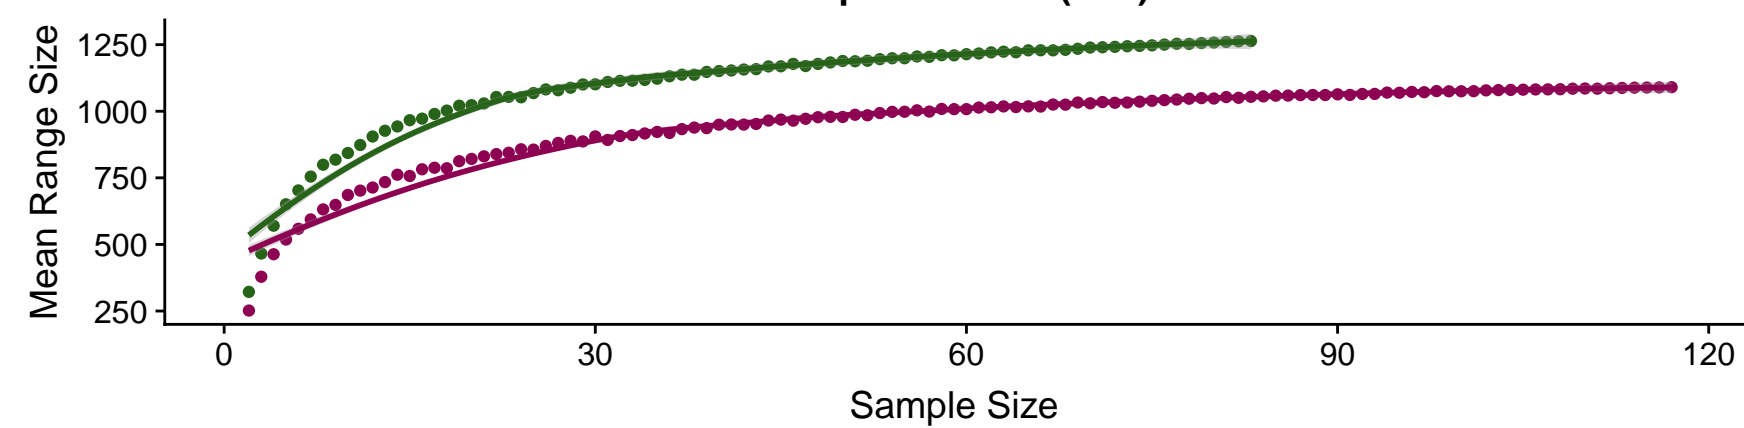

sex  
F  
M

**Occipital Temporal Lateral (S16)**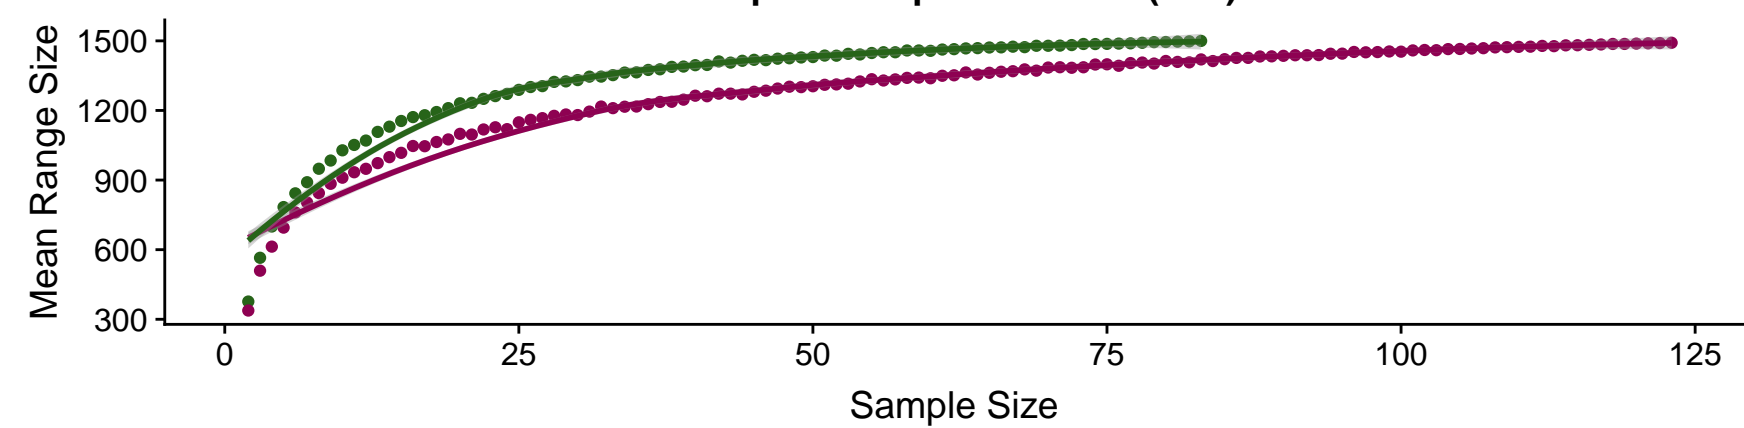

sex  
F  
M
