# Supplementary material
Source: PubMed Central journal article supplement (PMC7211446)

**Occipital Temporal Medial (S17)**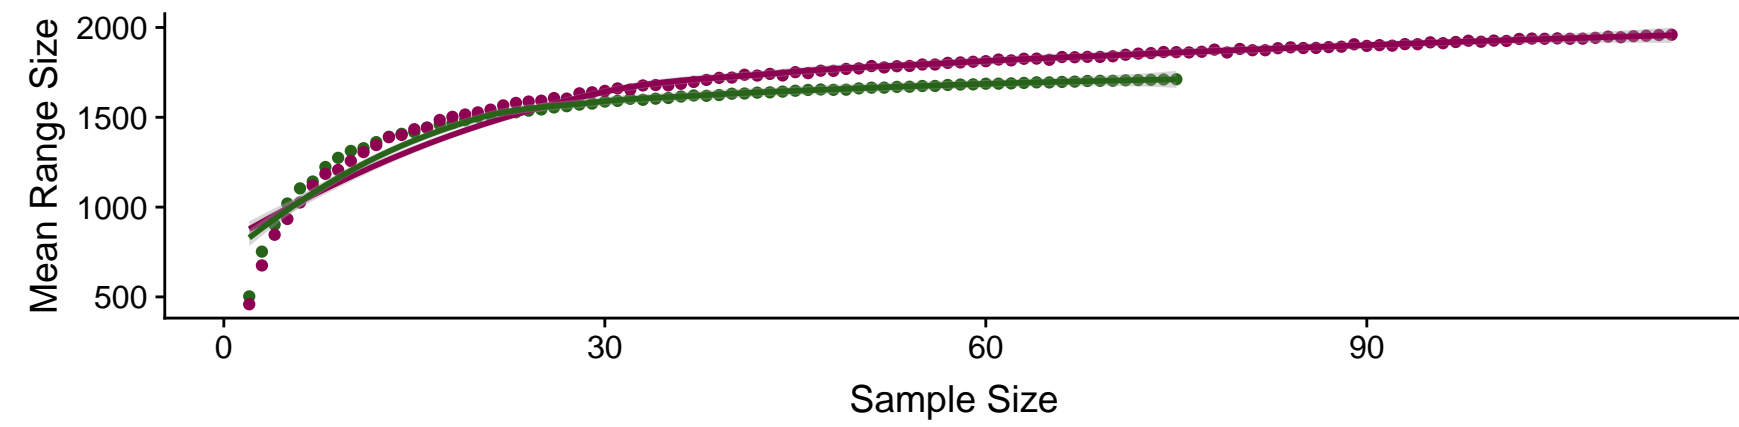**Orbital (S18)**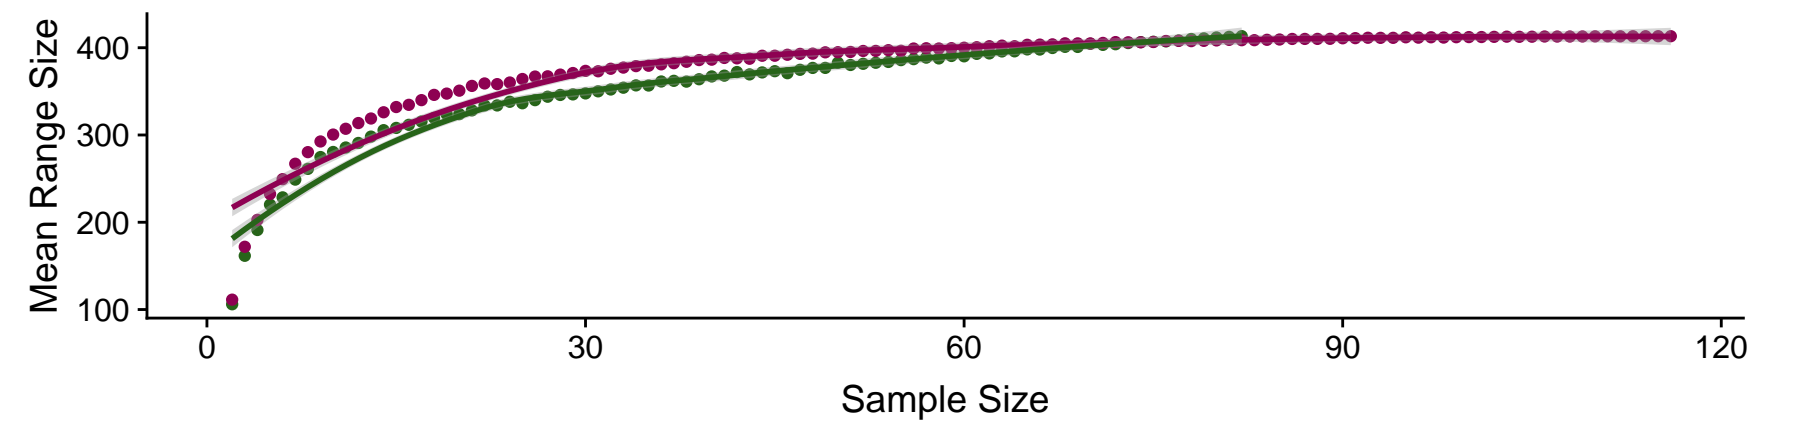**Superior Temporal (S19)**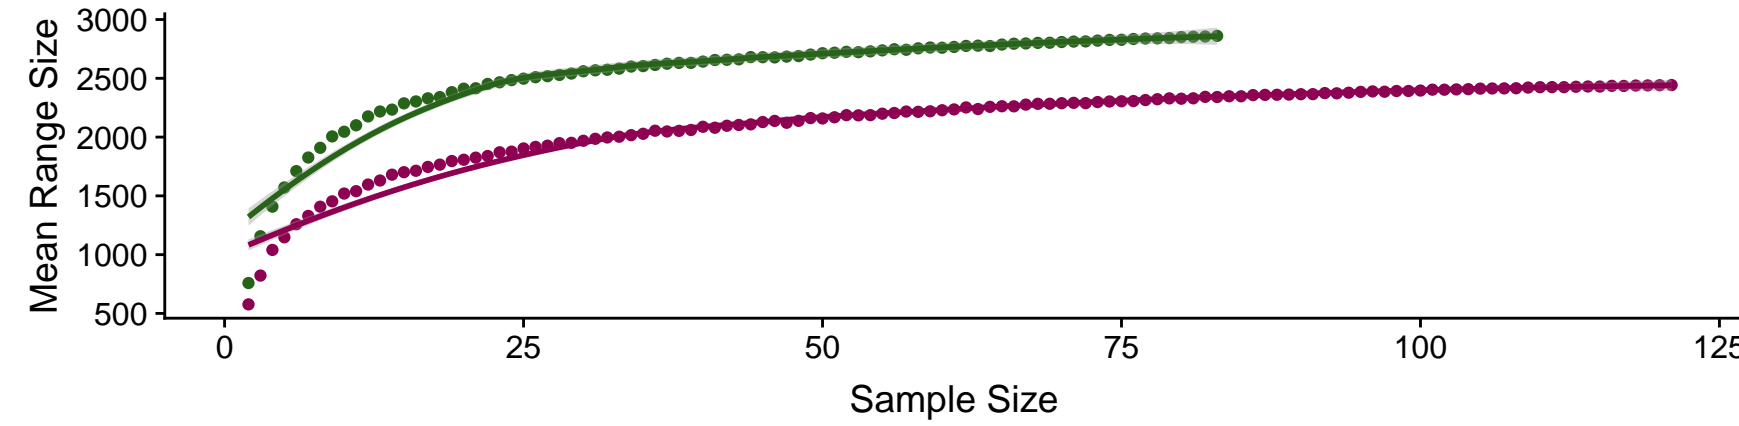**Superior Frontal (S20)**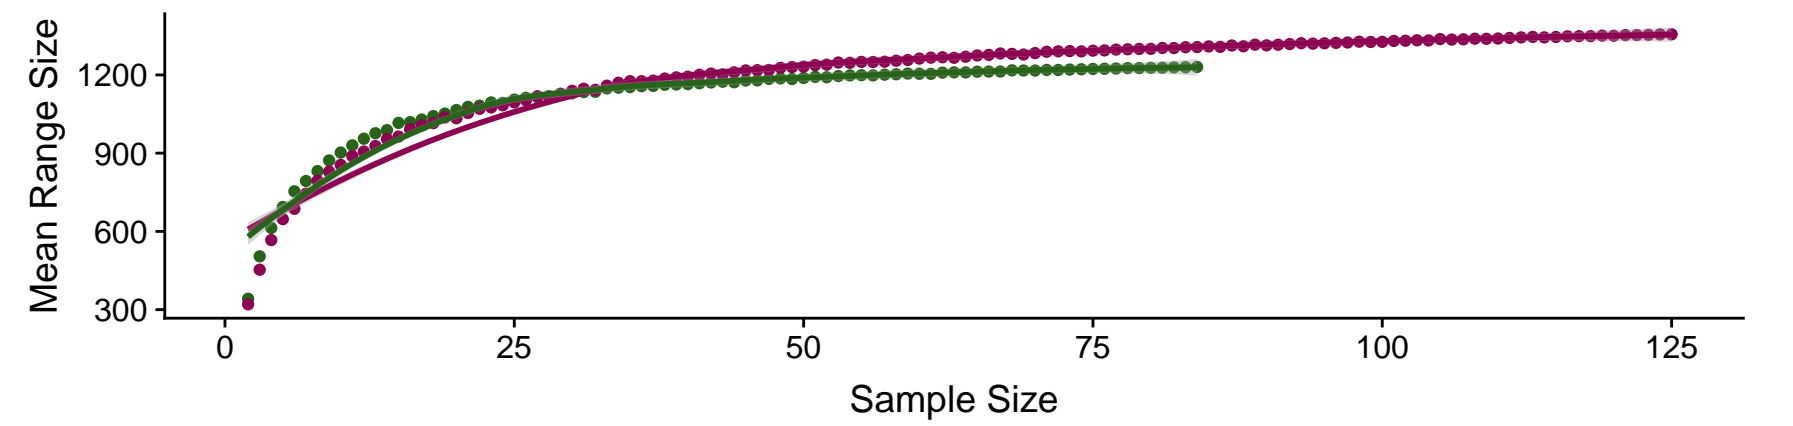**Superior Parietal (S21)**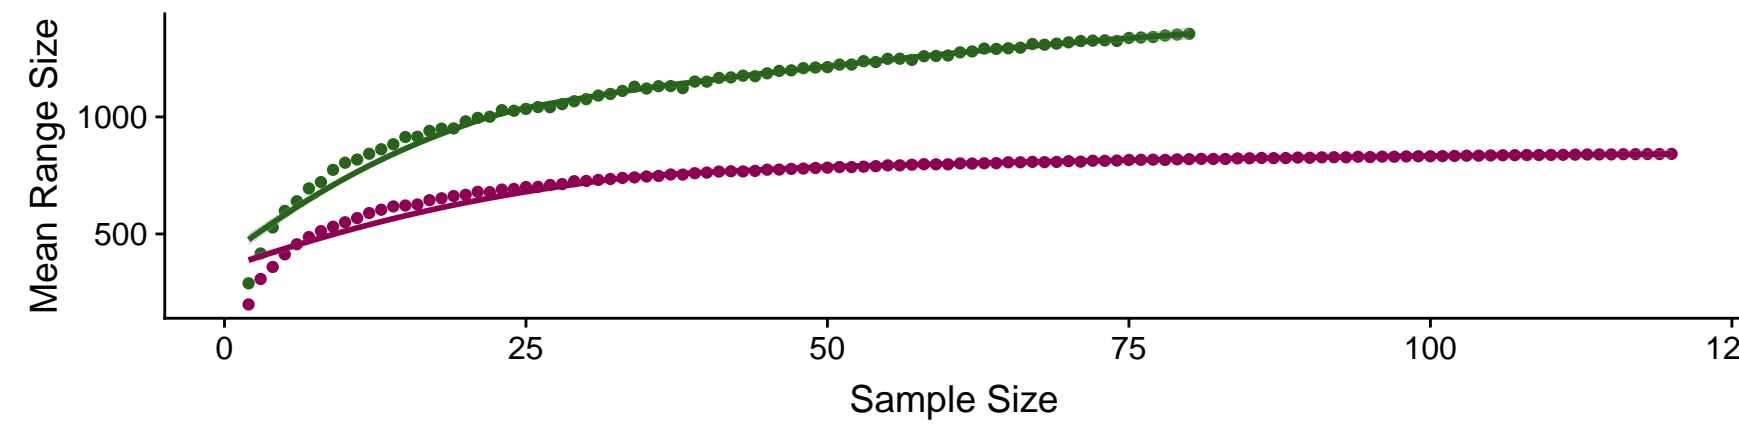**Superior Postcentral (S22)**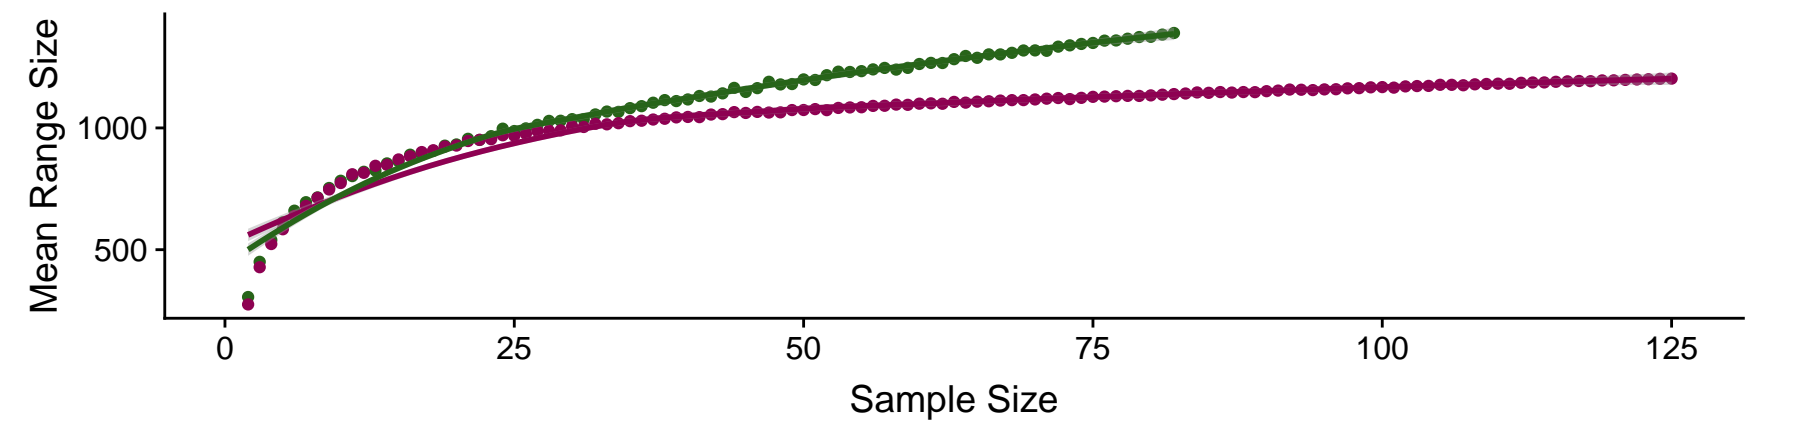**Superior Precentral (S23)**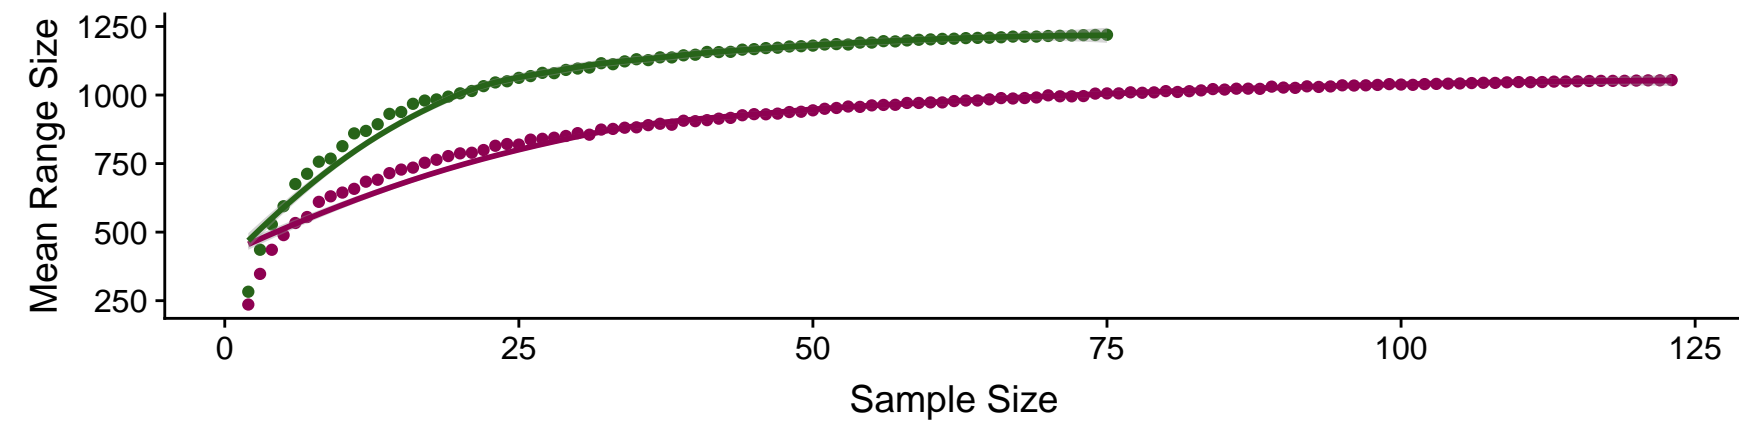**Sylvian (S24)**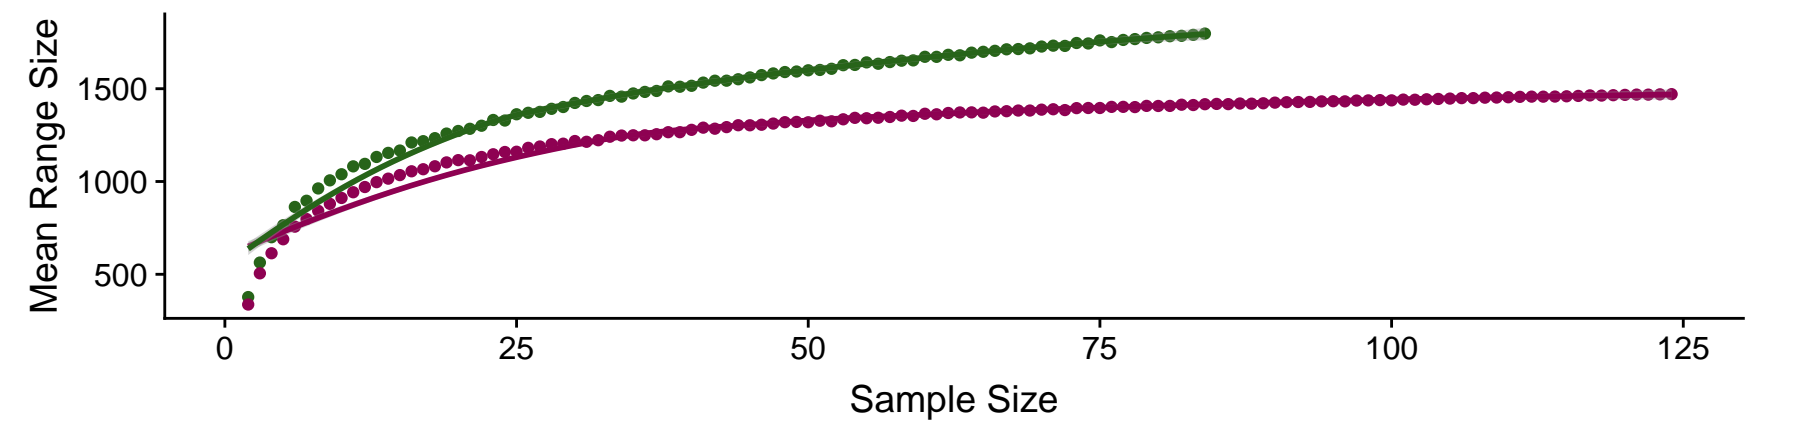

Supplement: rspb20192858supp5.pdf [file rspb20192858supp5.pdf]
