# Supplementary material
Source: PubMed Central journal article supplement (PMC7211446)

**Calcarine (S25)**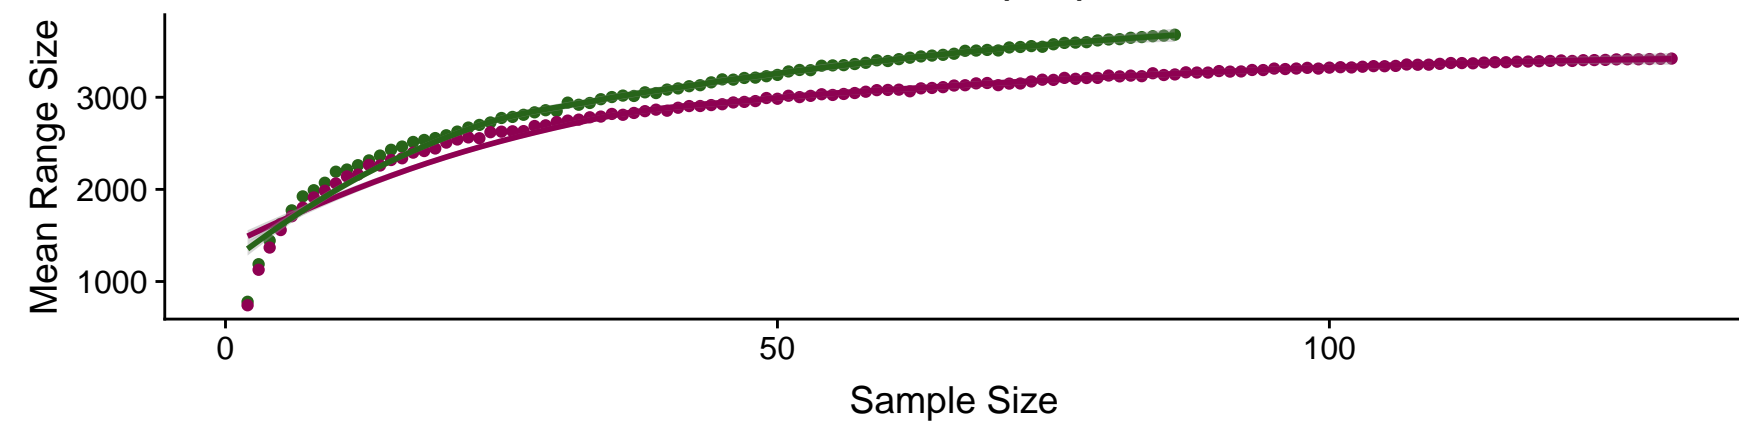**Cingulate (S26)**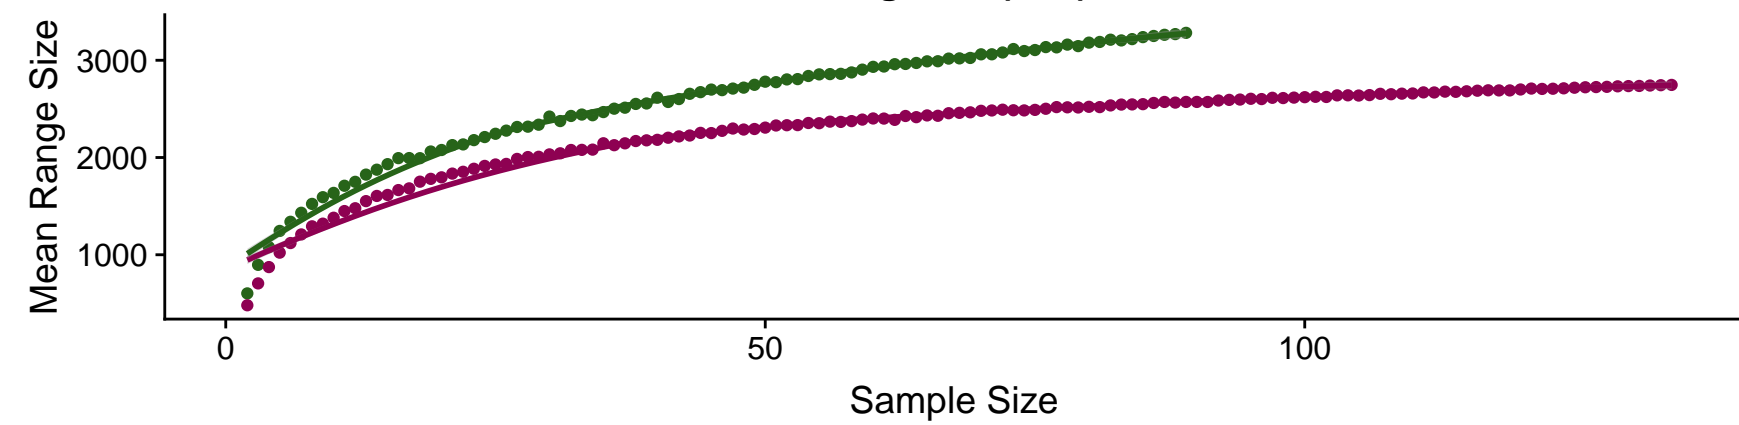**Cuneate (S27)**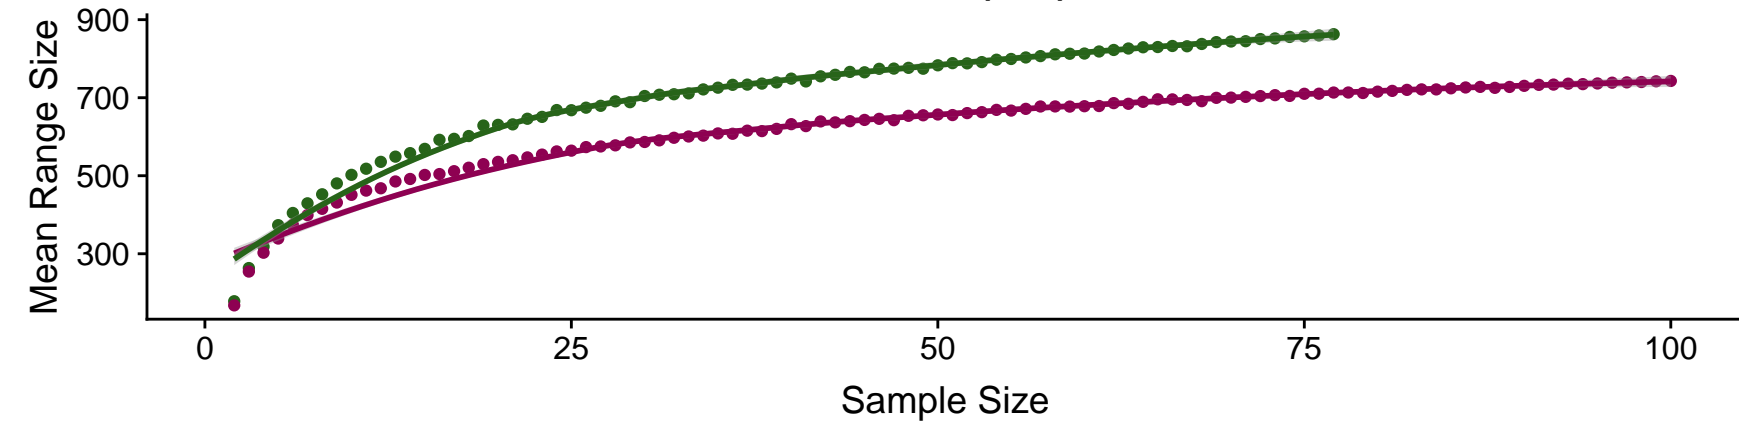**Fronto-Orbital (S28)**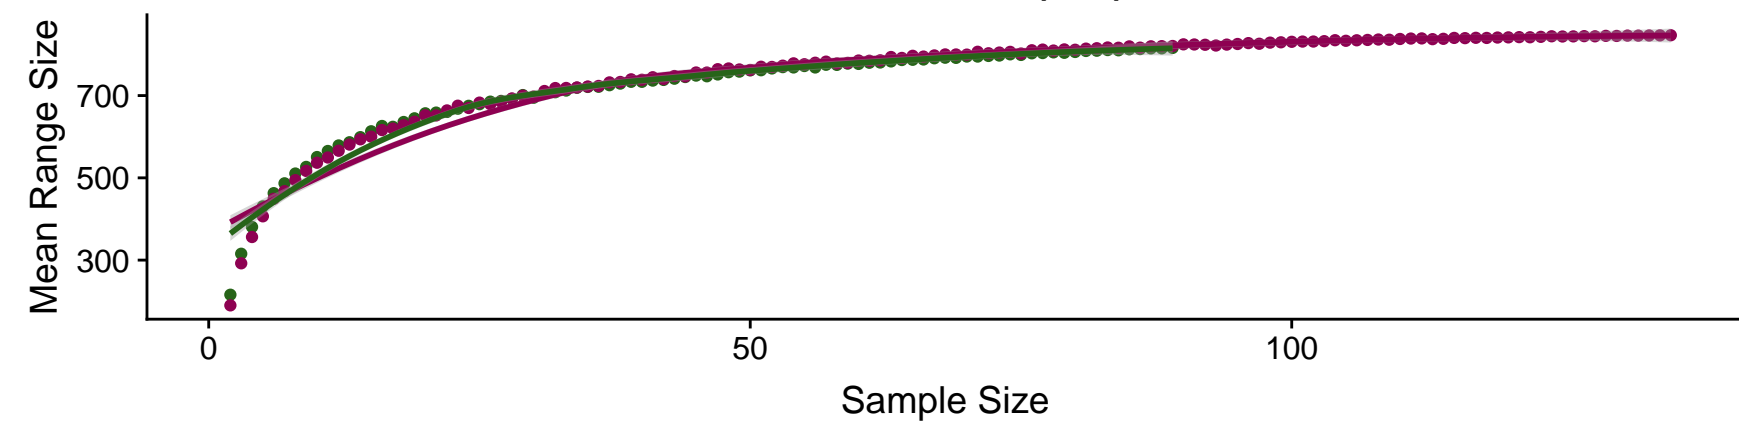**Inferior Frontal (S29)**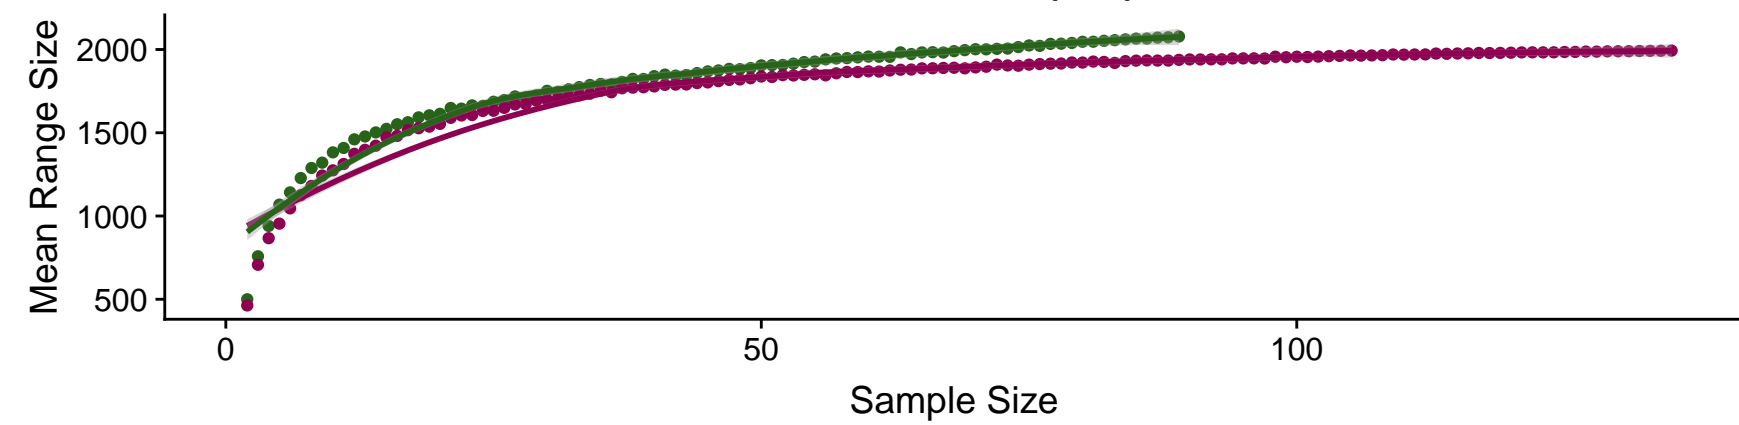**Inferior Postcentral (S30)**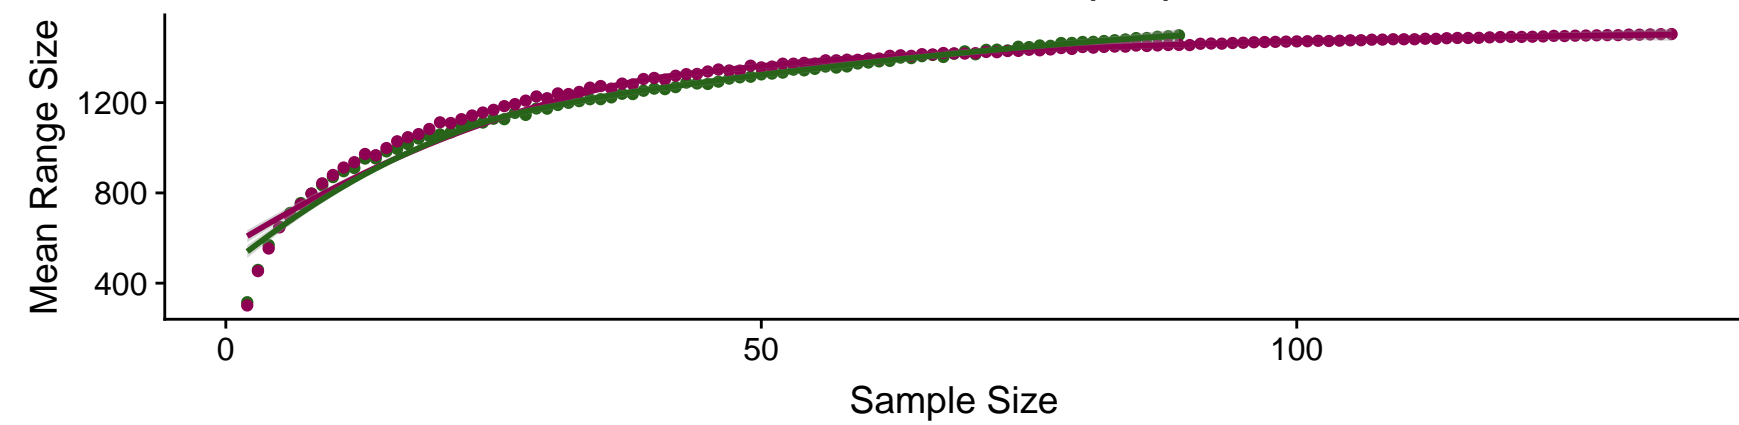**Inferior Precentral (S31)**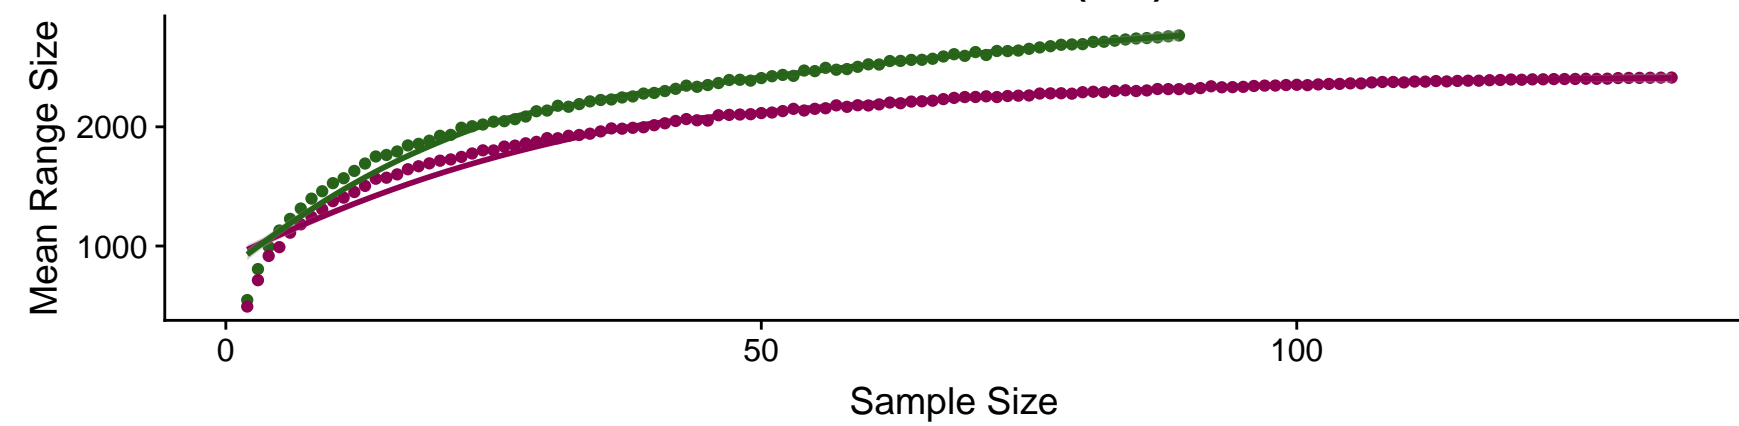**Inferior Temporal (S32)**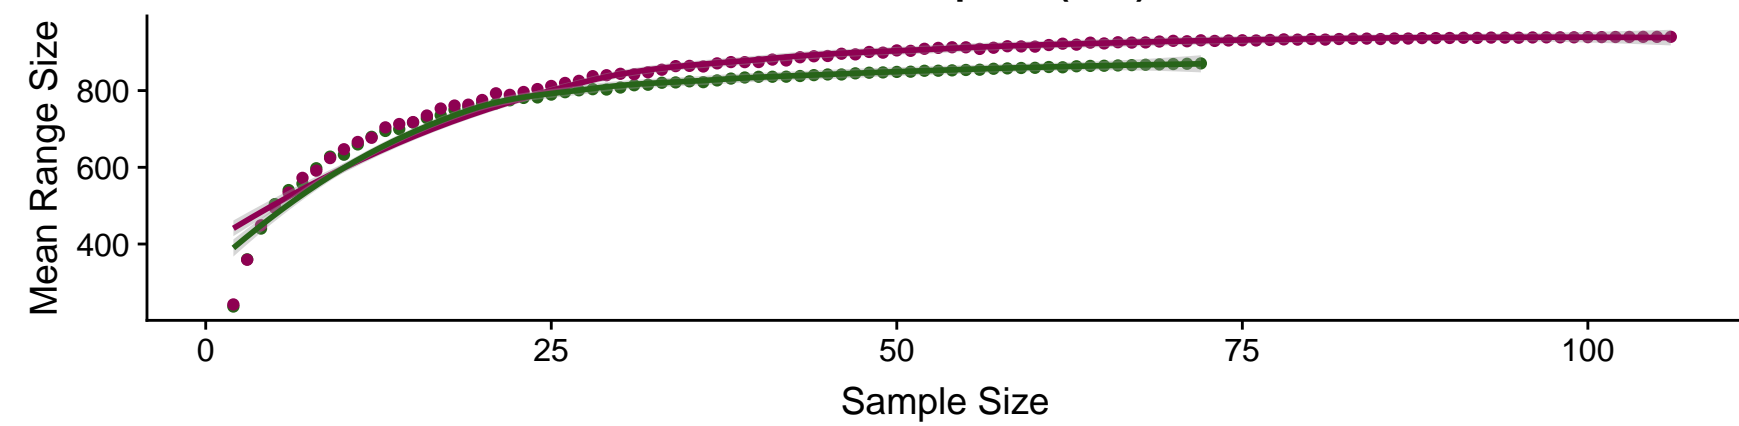

Supplement: rspb20192858supp6.pdf [file rspb20192858supp6.pdf]
