# Supplementary material
Source: PubMed Central journal article supplement (PMC7211446)

**Intraparietal (S33)**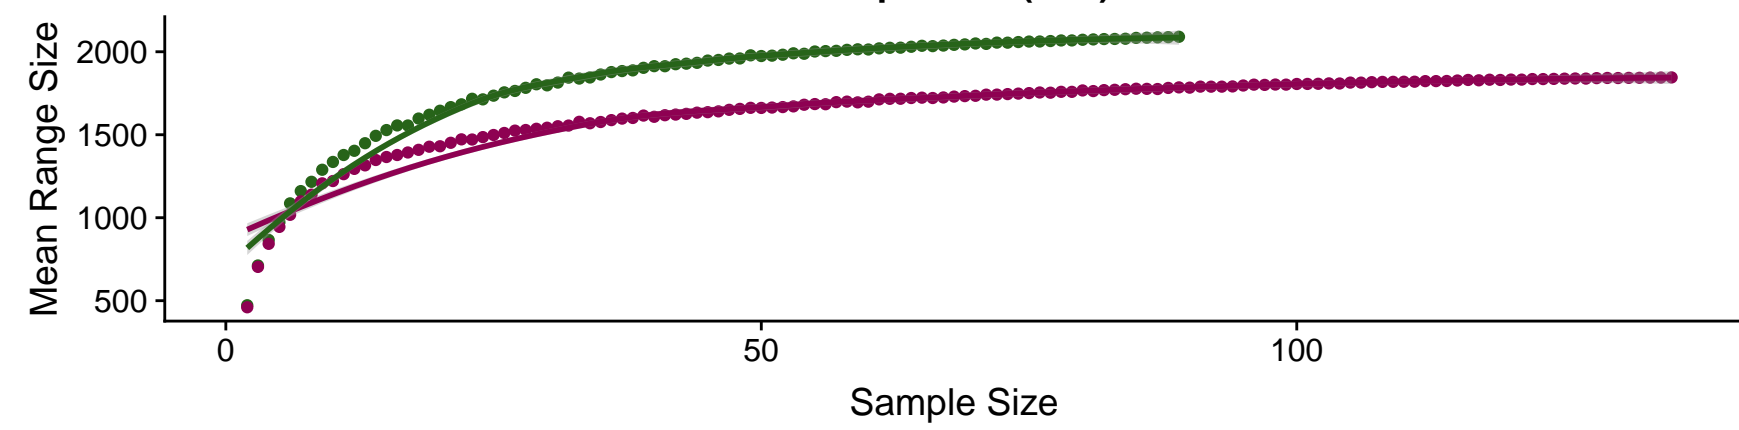**Lunate (S34)**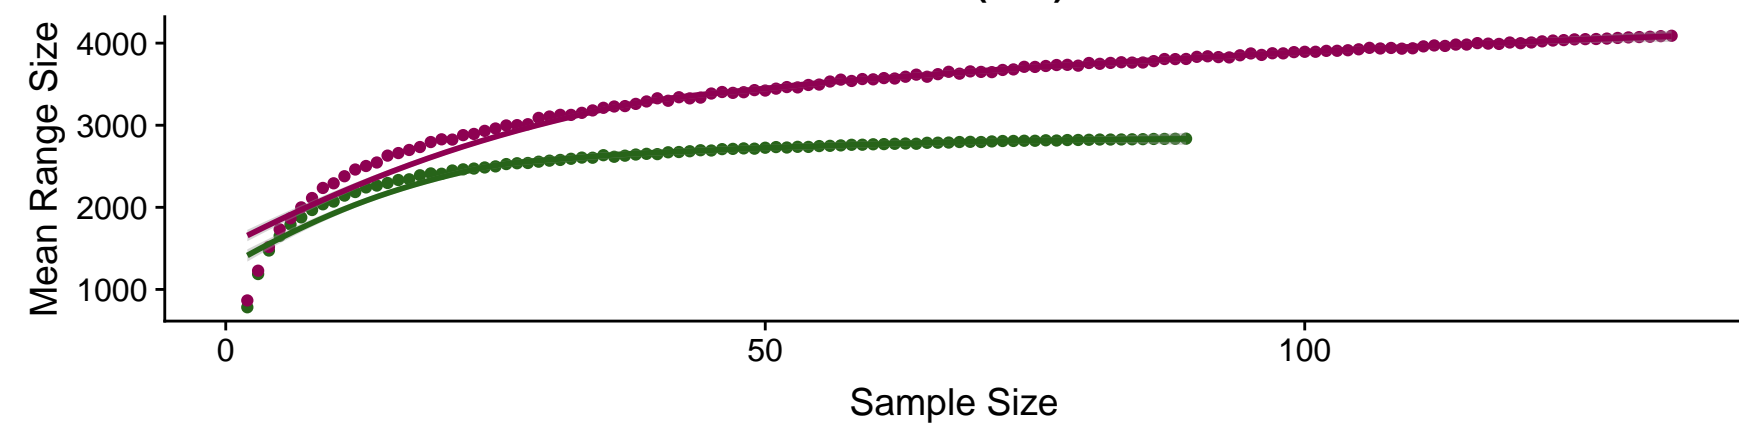**Medial Parieto-Occipital (S35)**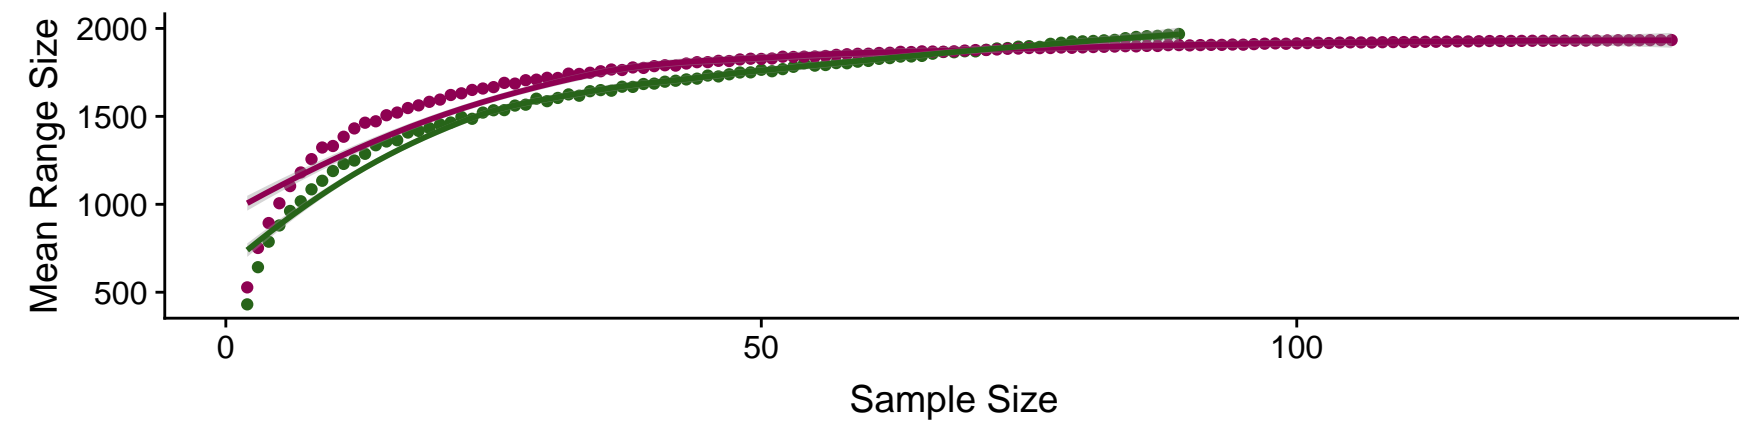**Middle Frontal (S36)**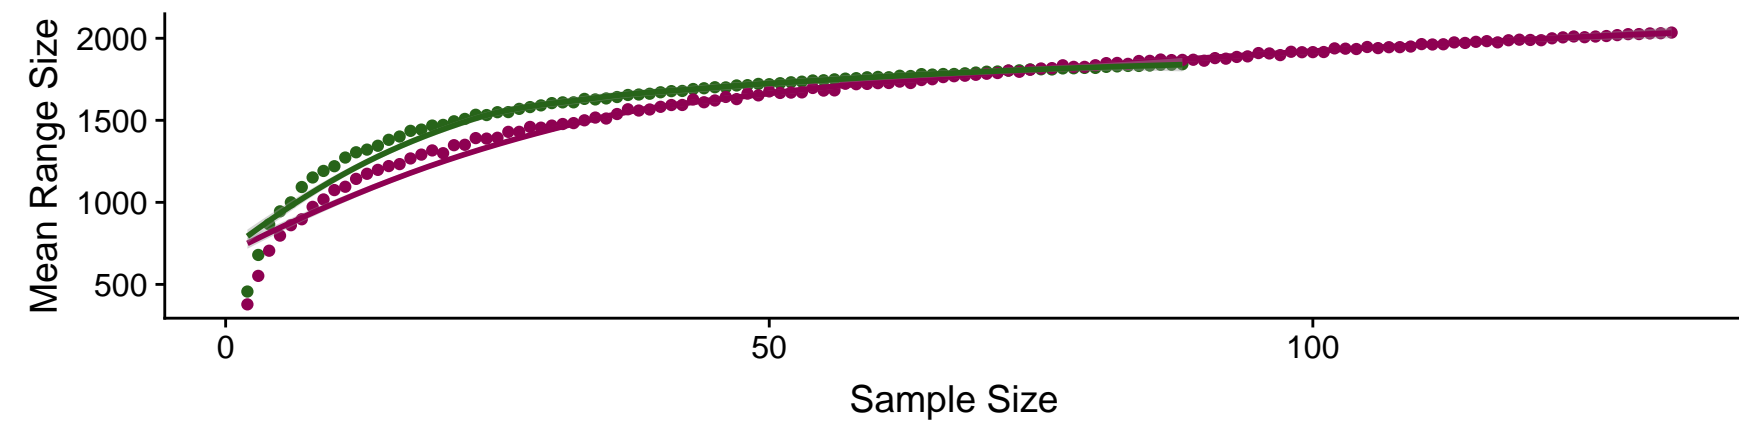**Middle Temporal (S37)**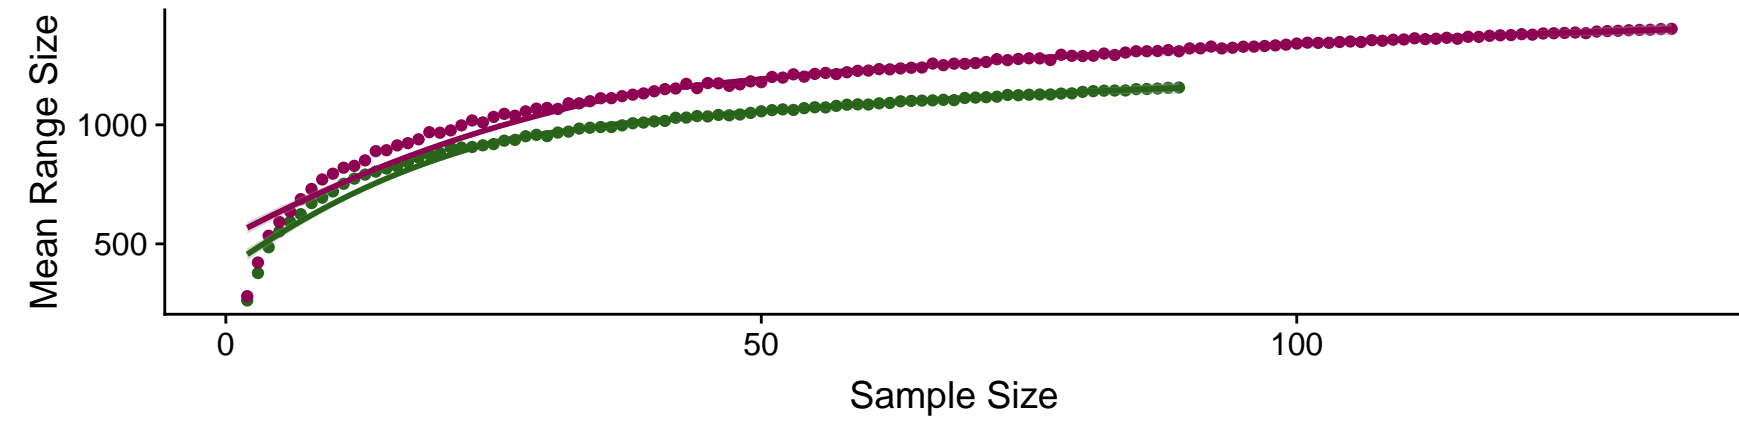**Mid-Superior Frontal (S38)**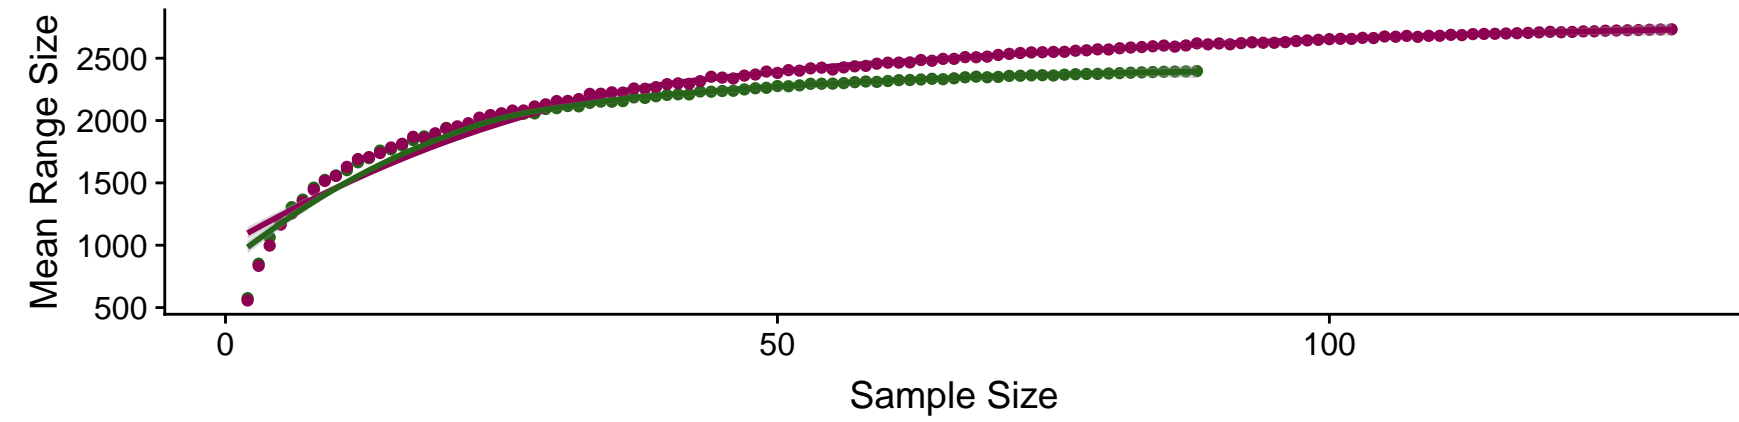**Occipital Lateral (S39)**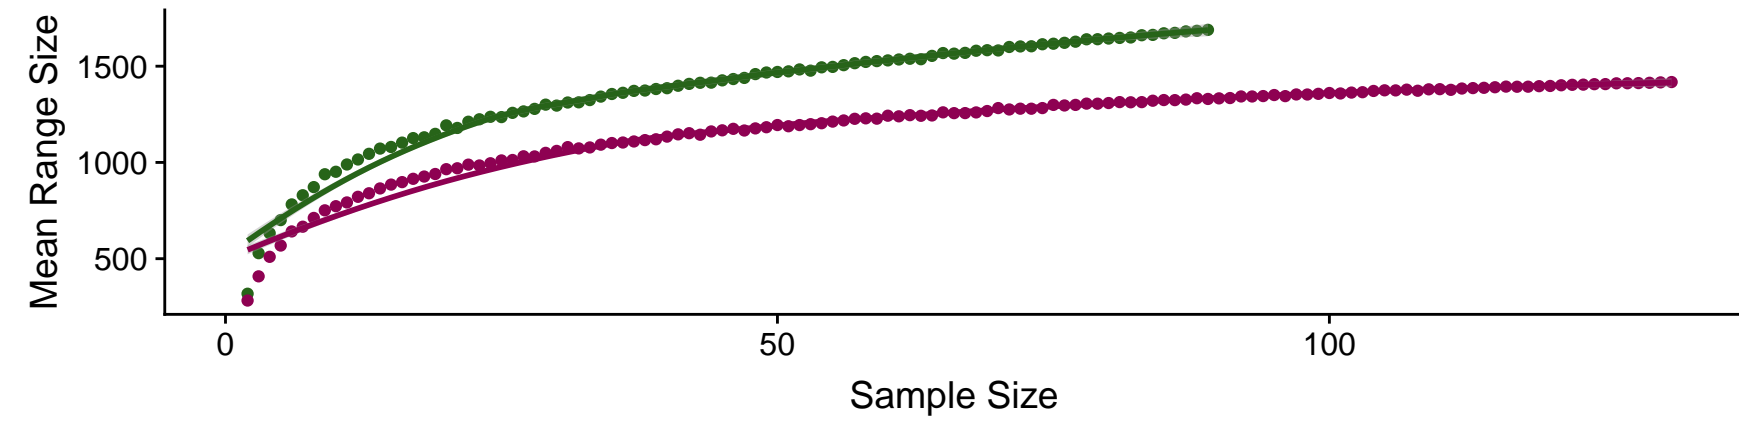**Occipital Temporal Lateral (S40)**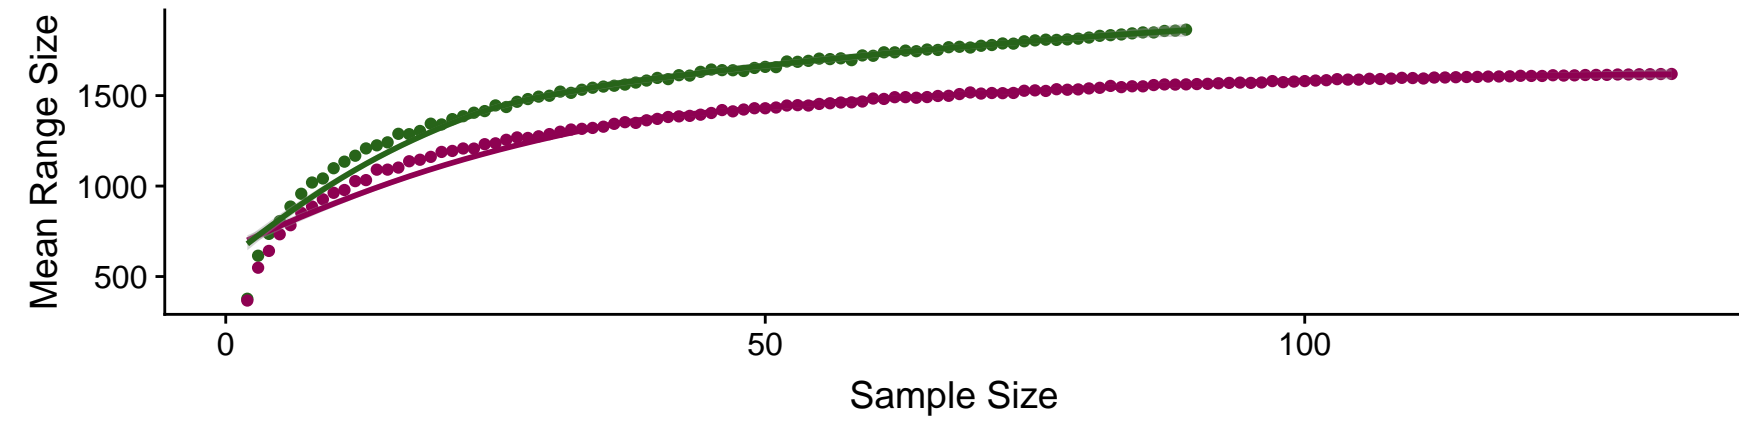

Supplement: rspb20192858supp7.pdf [file rspb20192858supp7.pdf]
