# Supplementary material
Source: PubMed Central journal article supplement (PMC7211446)

**Occipital Temporal Medial (S41)**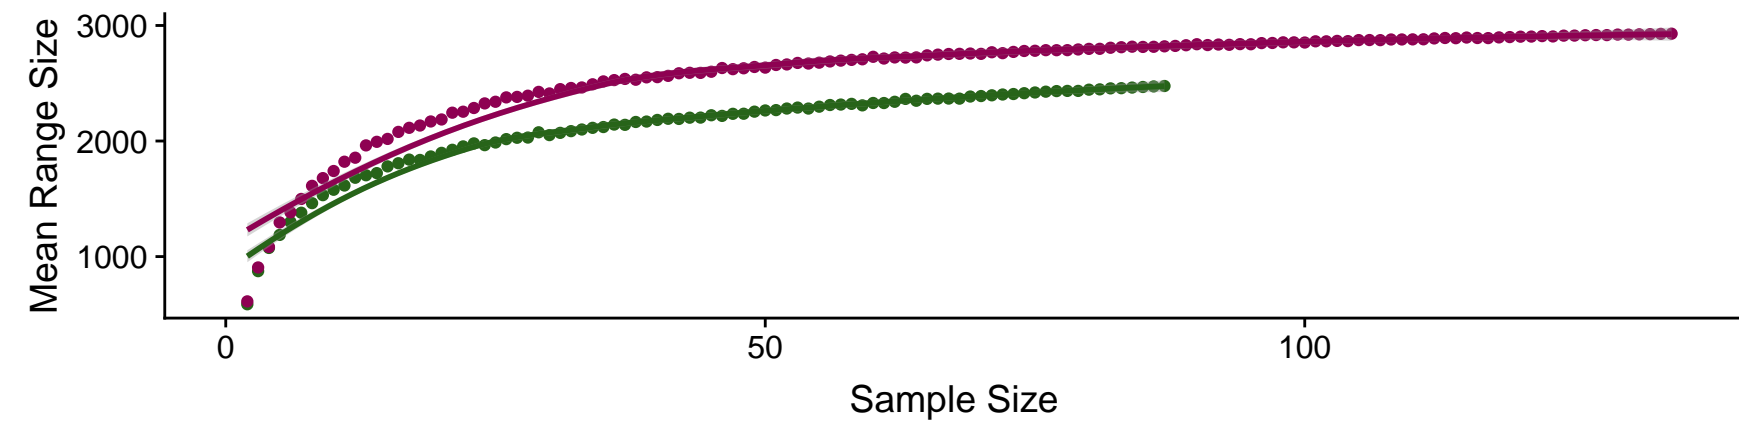**Orbital (S42)**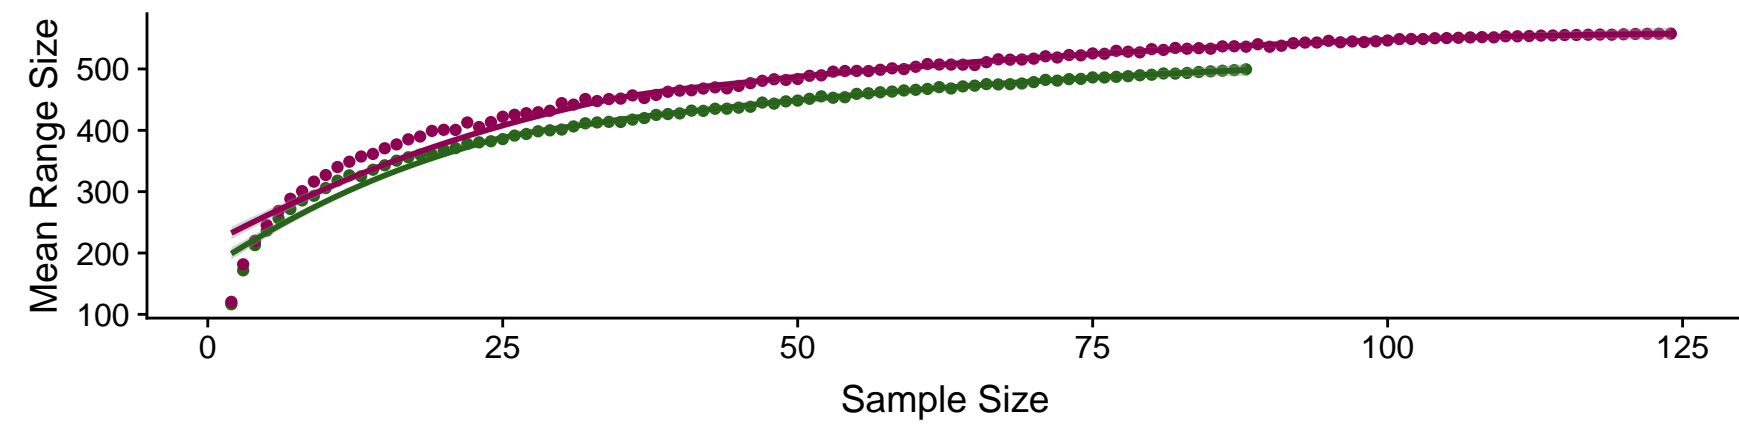**Superior Temporal (S43)**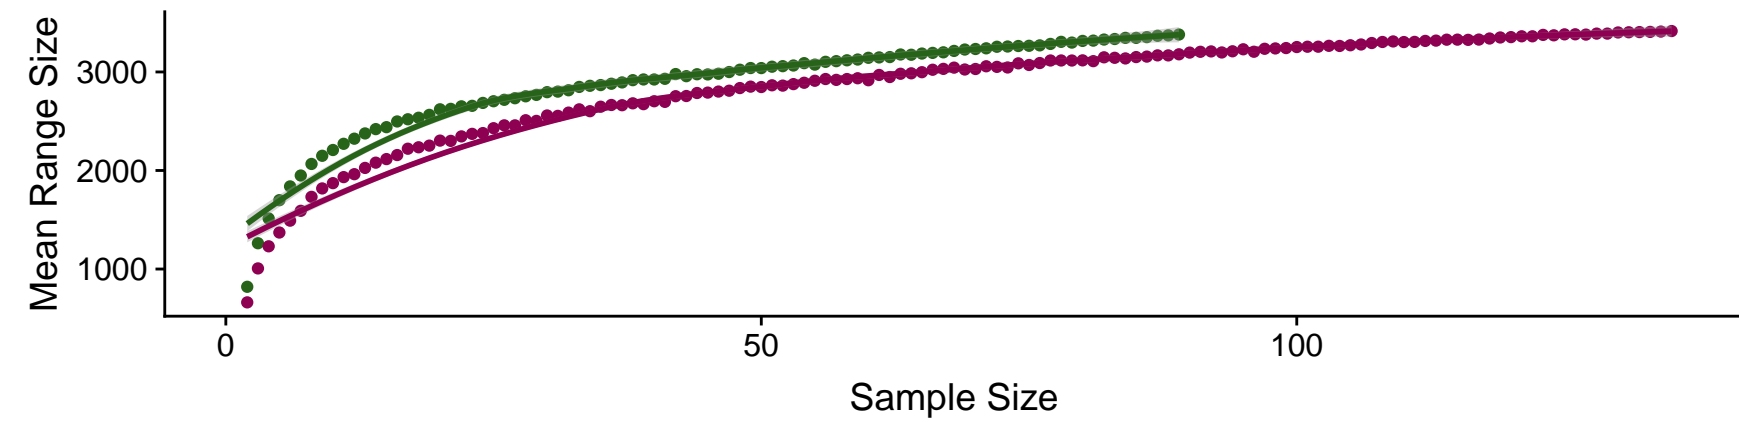**Superior Frontal (S44)**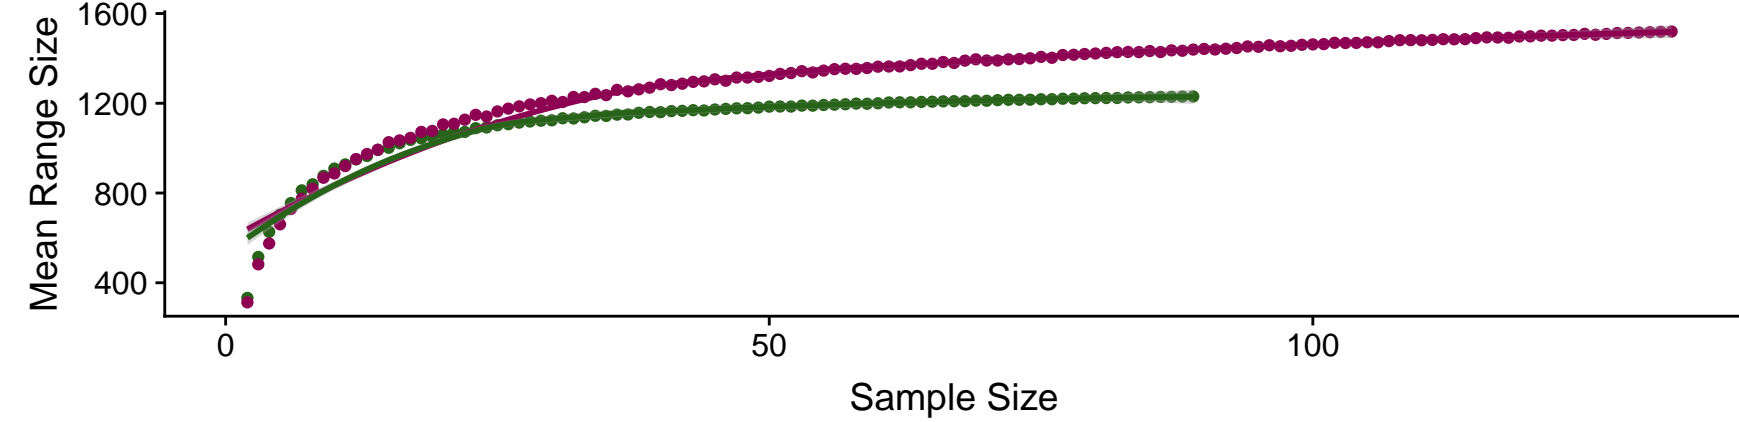**Superior Parietal (S45)**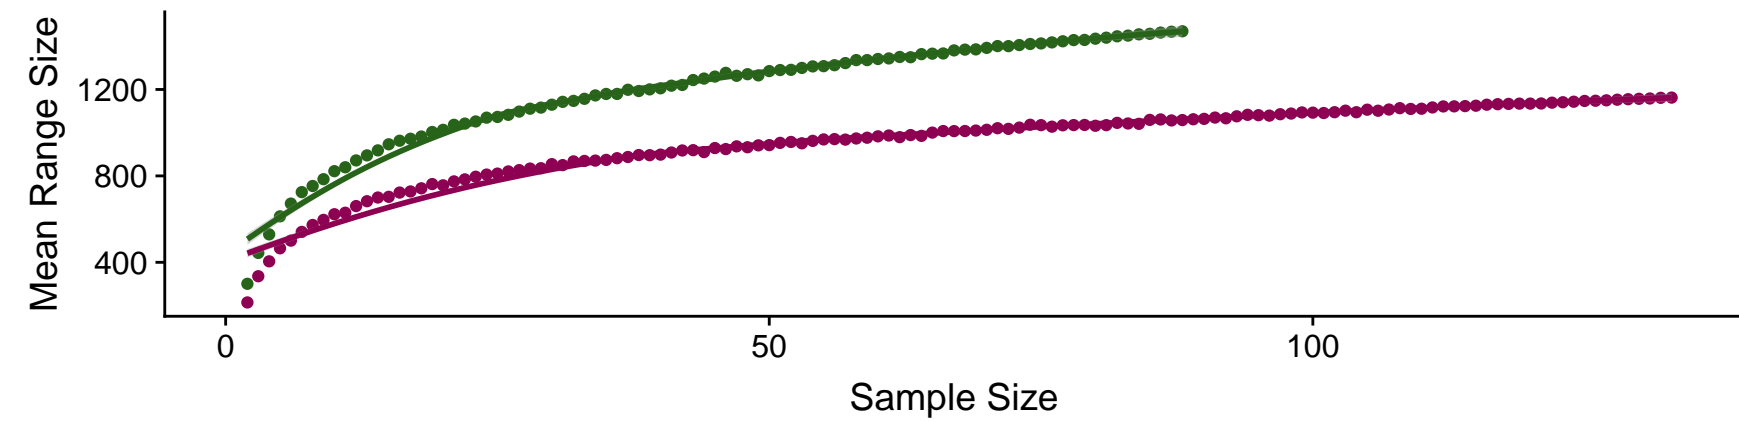**Superior Postcentral (S46)**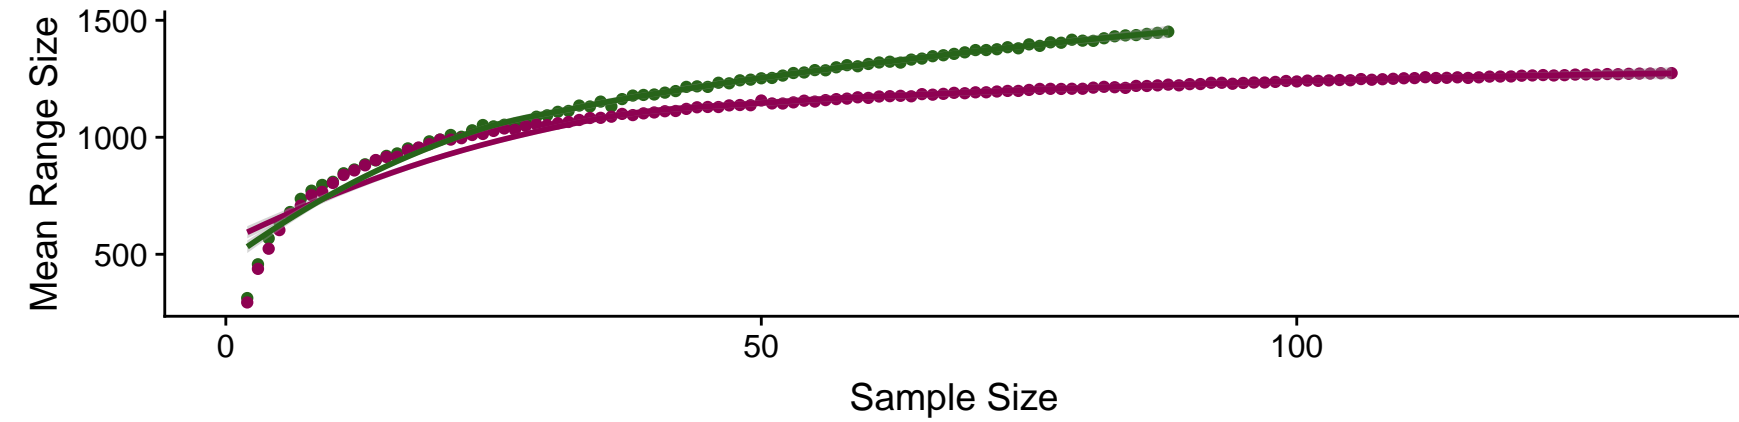**Superior Precentral (S47)**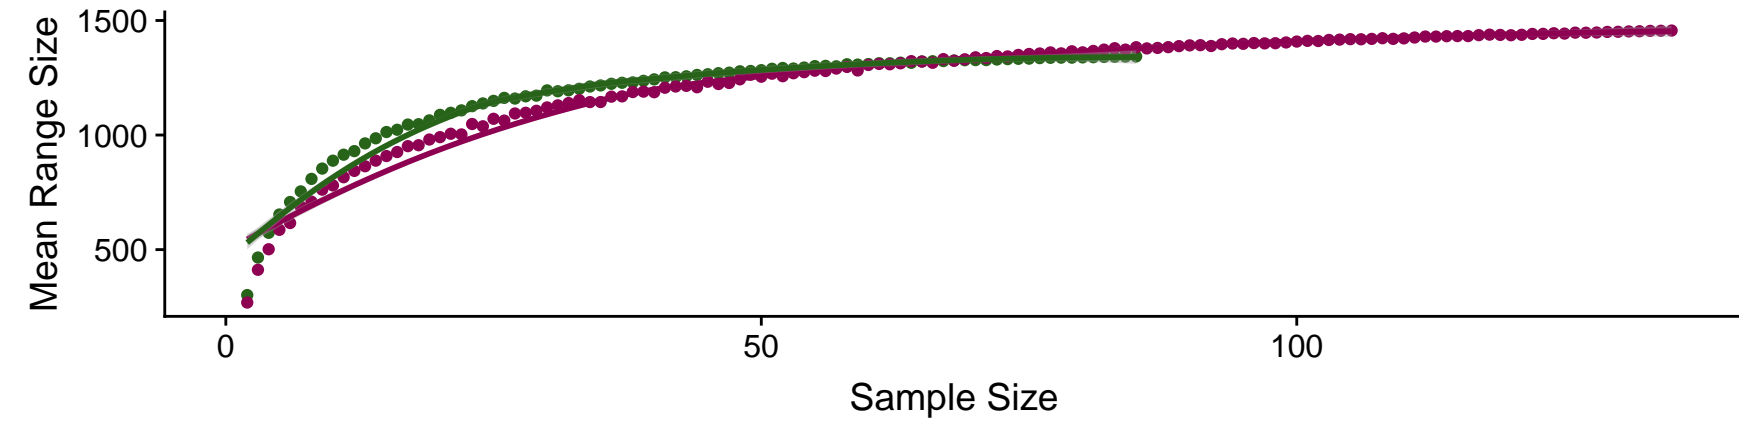**Sylvian (S48)**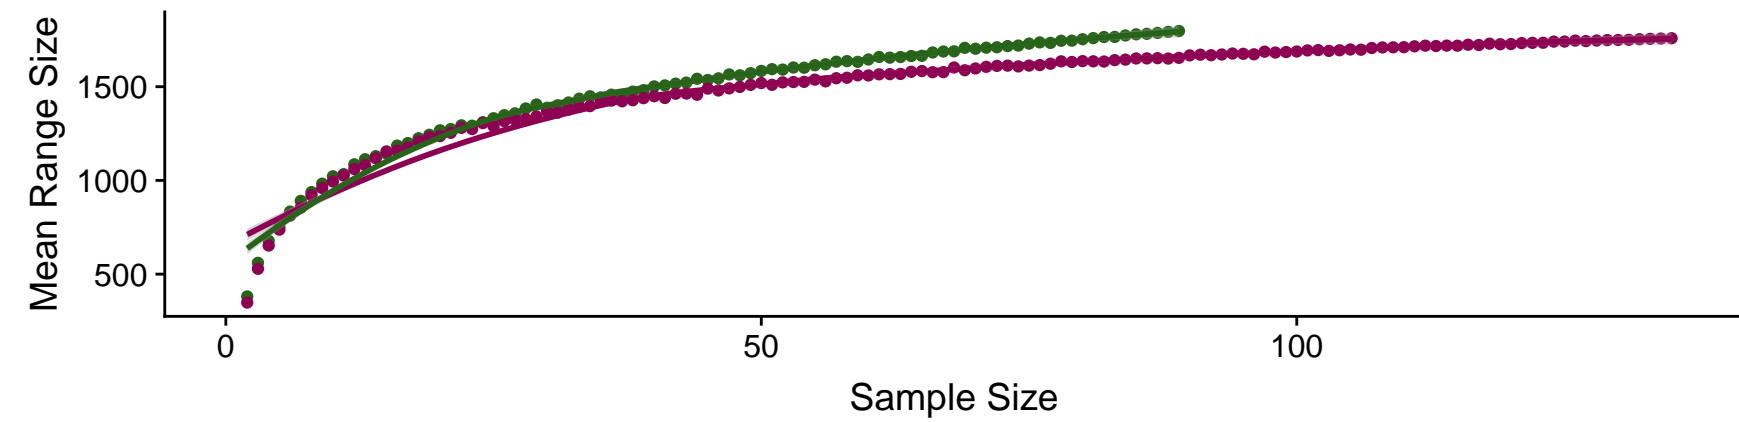

Supplement: rspb20192858supp8.pdf [file rspb20192858supp8.pdf]
